# Supplementary material for: Genome-scale Analysis of Escherichia coli FNR Reveals Complex Features of Transcription Factor Binding
Source: PLoS Genet. 2013 Jun 20;9(6):e1003565. doi: 10.1371/journal.pgen.1003565 (PMC3688515; doi:10.1371/journal.pgen.1003565)
Supplement: Table S1 — Peaks identified using NCIS from σ70 ChIP-seq data from cultures grown under aerobic and anaerobic growth conditions in GMM. (XLS) [file pgen.1003565.s007.xls]

## Sheet: Table S1
Table S1. Peaks identified using NCIS from s70 ChIP-seq data from cultures grown under aerobic and anaerobic growth conditions in GMM.
s70 Peak Location (nt) a	s70 Peak NCIS Score b	s70 Peak NCIS p-value c	s70 Peak O2 Condition c
151	18702.6	0	Anaerobic
5663	303.9	5.38e-58	Anaerobic
6472	363.18	2.13e-107	Anaerobic
8192	2035.23	0	Anaerobic
9246	351.1	3.05e-56	Anaerobic
10550	680.02	1.01e-229	Anaerobic
11134	148.52	2.17e-13	Anaerobic
13074	343.16	8.42e-79	Anaerobic
14105	267.27	9.95e-40	Anaerobic
16943	5202.36	0	Anaerobic
17444	1048.39	0	Anaerobic
18027	2233.14	0	Anaerobic
18608	285.11	2.49e-173	Anaerobic
19795	1174.95	0	Anaerobic
20580	213.57	0	Anaerobic
21122	24545.4	0	Anaerobic
21841	2392.94	0	Anaerobic
22550	575.21	8.17e-199	Anaerobic
25017	160.46	8.27e-27	Anaerobic
25681	202.7	4.61e-25	Anaerobic
28331	1039.76	0	Anaerobic
29557	3036.38	0	Anaerobic
34197	753.05	2.78e-219	Anaerobic
34904	158.38	2.59e-22	Anaerobic
37483	457.7	2.56e-116	Anaerobic
39939	535.48	1.91e-150	Anaerobic
40919	333.58	1.24e-67	Anaerobic
47182	392.2	1.54e-95	Anaerobic
49233	194.44	4.15e-29	Anaerobic
49797	2074.78	0	Anaerobic
51951	393.42	3.42e-93	Anaerobic
52601	329.98	5.59e-87	Anaerobic
57175	2151.27	0	Anaerobic
58723	2744.54	0	Anaerobic
59304	202.28	1.55e-47	Anaerobic
63366	1173.98	0	Anaerobic
64178	276.21	1.6e-46	Anaerobic
64752	349.39	4.55e-84	Anaerobic
65809	371.46	1.8e-70	Anaerobic
70229	187.11	4.3e-21	Anaerobic
71308	326.63	3.79e-72	Anaerobic
75621	686.49	2.36e-195	Anaerobic
76272	143.12	2.81e-18	Anaerobic
77578	265.68	9.76e-111	Anaerobic
77925	612.77	7.26e-209	Anaerobic
78476	258.95	2.62e-67	Anaerobic
82643	212.39	2.13e-57	Anaerobic
83731	27210.2	0	Anaerobic
84897	677.23	2e-173	Anaerobic
85598	1664.15	0	Anaerobic
87984	2098.16	0	Anaerobic
89602	5012.82	0	Anaerobic
99373	719.77	1.95e-240	Anaerobic
102199	184.5	1.14e-46	Anaerobic
103720	141.35	3.43e-27	Anaerobic
104663	350.19	1.1e-94	Anaerobic
105139	331.42	1.5e-60	Anaerobic
106516	13874.1	0	Anaerobic
107681	1167.07	0	Anaerobic
109596	157.36	3.67e-24	Anaerobic
112714	144.33	3.33e-12	Anaerobic
113377	13161.3	0	Anaerobic
116411	217.68	5.11e-37	Anaerobic
117048	334.86	2.25e-61	Anaerobic
117737	616.89	4.25e-174	Anaerobic
118674	443.26	6.31e-165	Anaerobic
120748	130.93	2.3e-28	Anaerobic
121641	1984.19	0	Anaerobic
122043	842.6	0	Anaerobic
127744	264.34	1.62e-59	Anaerobic
130172	154.35	4.11e-16	Anaerobic
131520	1081.79	0	Anaerobic
134338	271.14	7.76e-41	Anaerobic
135547	232.23	4.42e-32	Anaerobic
136503	4655.43	0	Anaerobic
136935	6576.64	0	Anaerobic
141363	4358.84	0	Anaerobic
142691	484.99	3.21e-145	Anaerobic
144451	128.05	1.75e-34	Anaerobic
145110	168.96	1.55e-31	Anaerobic
146748	10716.4	0	Anaerobic
147584	440.7	1.37e-134	Anaerobic
147928	496.36	1.1e-136	Anaerobic
148836	387.92	4.85e-86	Anaerobic
149643	1479.08	0	Anaerobic
150547	970.88	0	Anaerobic
151810	211.38	3.28e-28	Anaerobic
154889	492.46	3.51e-103	Anaerobic
155420	358.13	1.1e-98	Anaerobic
156102	265.69	2.5e-29	Anaerobic
157221	152.36	1.21e-16	Anaerobic
159165	8855.32	0	Anaerobic
160048	238.51	5.38e-44	Anaerobic
160656	1581.65	0	Anaerobic
162064	457.24	4.54e-137	Anaerobic
164230	244.84	9.83e-46	Anaerobic
164687	464.97	4.14e-115	Anaerobic
167305	226.17	1.67e-28	Anaerobic
173414	352.9	9.81e-108	Anaerobic
174381	788.68	4.27e-268	Anaerobic
174934	1796.41	0	Anaerobic
175886	238.86	1.89e-74	Anaerobic
176572	5359.07	0	Anaerobic
179192	846.36	1.6e-260	Anaerobic
183228	318.19	1.45e-59	Anaerobic
184191	865.35	0	Anaerobic
186137	4433.81	0	Anaerobic
188779	770.07	1.78e-272	Anaerobic
189702	10774.6	0	Anaerobic
191799	411.96	4.93e-98	Anaerobic
192623	1329.44	0	Anaerobic
193966	280.9	1.37e-70	Anaerobic
194780	1761.93	0	Anaerobic
196172	391.13	1.68e-92	Anaerobic
196563	418.56	1.74e-114	Anaerobic
197299	1113.3	0	Anaerobic
200380	612.09	4.67e-188	Anaerobic
201486	3078.65	0	Anaerobic
202079	6527.57	0	Anaerobic
206877	193.08	6.8e-31	Anaerobic
207622	262.19	1.24e-65	Anaerobic
208351	714.03	0	Anaerobic
212318	295.37	3.81e-50	Anaerobic
214195	1011.32	0	Anaerobic
214966	473.14	3.5e-160	Anaerobic
216254	241.28	5.14e-49	Anaerobic
216996	209.97	1.24e-51	Anaerobic
218847	10326	0	Anaerobic
220017	2003.71	0	Anaerobic
221007	883.57	2.04E-314	Anaerobic
222709	2114.59	0	Anaerobic
223465	8553.87	0	Anaerobic
226300	135.85	1.27e-42	Anaerobic
229087	270.15	1.98e-110	Anaerobic
231077	1691.45	0	Anaerobic
232405	410.13	2.03e-124	Anaerobic
233584	287.1	1.73e-87	Anaerobic
233983	3999.49	0	Anaerobic
234798	965.41	0	Anaerobic
235571	231.94	1.69e-43	Anaerobic
236036	2731.21	0	Anaerobic
236914	7189.55	0	Anaerobic
240221	552.06	6.34e-187	Anaerobic
243513	1660.57	0	Anaerobic
245883	2837.23	0	Anaerobic
246522	1740.81	0	Anaerobic
247935	216.68	7.77e-55	Anaerobic
252572	209.49	4.32e-23	Anaerobic
253426	229.35	1.06e-32	Anaerobic
255382	127.52	4.99e-18	Anaerobic
255923	8351.7	0	Anaerobic
256514	539.49	5.01e-140	Anaerobic
257857	296.23	1.7e-50	Anaerobic
259576	6682.06	0	Anaerobic
260751	180.24	7.24e-24	Anaerobic
262059	22652.9	0	Anaerobic
265331	151.88	3.07e-17	Anaerobic
266932	349.06	4.88e-71	Anaerobic
268317	1544.97	0	Anaerobic
271224	169.57	1.66e-18	Anaerobic
274528	727.59	1.56e-251	Anaerobic
275915	255.66	1.03e-49	Anaerobic
277903	234.82	9.38e-35	Anaerobic
280037	302.04	3.05e-73	Anaerobic
288398	919.61	1.01E-314	Anaerobic
289552	709.06	7.82E-318	Anaerobic
290614	156.74	0	Anaerobic
291496	1612.84	0	Anaerobic
292170	500.96	3.68e-238	Anaerobic
292916	462.38	4e-188	Anaerobic
293875	142.46	1.81e-11	Anaerobic
294630	2807.07	0	Anaerobic
295846	390.65	1.83e-79	Anaerobic
296424	432.66	2.09e-200	Anaerobic
298497	132.63	1.5e-12	Anaerobic
302188	3344.75	0	Anaerobic
302915	366.44	9.45e-64	Anaerobic
303606	128.96	1.15e-40	Anaerobic
304308	276.49	1.06e-93	Anaerobic
305230	175.48	1.44e-32	Anaerobic
305628	312.12	7.55e-86	Anaerobic
307012	1451.8	0	Anaerobic
309411	283.42	7.6e-52	Anaerobic
310098	438.49	4.59e-102	Anaerobic
310613	132.91	6.29e-08	Anaerobic
311317	295.8	2.51e-69	Anaerobic
311987	301.53	1.16e-43	Anaerobic
316496	294.69	2.1e-56	Anaerobic
317320	145.14	6.37e-12	Anaerobic
317992	285.03	3.49e-39	Anaerobic
319341	180.25	5.22e-15	Anaerobic
324084	452.57	2.98e-94	Anaerobic
330765	197.46	4.21e-19	Anaerobic
331270	768.91	3.96e-197	Anaerobic
331719	186.97	5.38e-36	Anaerobic
333694	176.43	9.47e-28	Anaerobic
341900	330.64	2.1e-68	Anaerobic
342870	144.4	2.65e-25	Anaerobic
343237	172.36	4.24e-18	Anaerobic
343894	163.49	3.28e-25	Anaerobic
344486	8947.08	0	Anaerobic
354098	10044.9	0	Anaerobic
356780	167.84	3.09e-23	Anaerobic
360440	194.38	1.15e-22	Anaerobic
361126	590.14	8.15e-157	Anaerobic
362339	468.69	8.89e-134	Anaerobic
365587	143.79	7.14e-15	Anaerobic
366718	135.67	4.43e-22	Anaerobic
375962	277.36	1.26e-45	Anaerobic
376780	369.2	2.06e-86	Anaerobic
379124	5938.5	0	Anaerobic
388975	961.68	2.27e-282	Anaerobic
389601	316.97	6.04e-70	Anaerobic
390161	364.51	4.62e-90	Anaerobic
390698	138.69	2.05e-32	Anaerobic
392202	133.15	8.26e-58	Anaerobic
392601	585.65	3.67e-187	Anaerobic
393676	1001.59	0	Anaerobic
395576	805.7	0	Anaerobic
398802	1277.87	0	Anaerobic
400265	1811.47	0	Anaerobic
400584	451.86	0	Anaerobic
402859	1089.1	0	Anaerobic
404954	5277.14	0	Anaerobic
405555	5858.63	0	Anaerobic
406292	1144.26	0	Anaerobic
407378	995.89	0	Anaerobic
407822	715.9	1.04e-232	Anaerobic
408270	161.53	3.95e-13	Anaerobic
409283	340.76	1.02e-88	Anaerobic
410531	171.8	2.23e-20	Anaerobic
411743	466.76	2.44e-154	Anaerobic
413096	258.62	7.95e-42	Anaerobic
416216	217.76	1.42e-51	Anaerobic
417535	1106.88	0	Anaerobic
418632	1007.02	0	Anaerobic
418933	243.46	1.43e-307	Anaerobic
419975	1067.84	0	Anaerobic
421763	178.33	1.14e-20	Anaerobic
424199	1550.11	0	Anaerobic
425982	194.89	4.34e-44	Anaerobic
426416	4298.33	0	Anaerobic
426947	232.85	6.95e-40	Anaerobic
428673	177.23	8.67e-39	Anaerobic
429800	886.06	2.41e-307	Anaerobic
430184	245.59	2.75e-63	Anaerobic
431371	830.18	3.59E-312	Anaerobic
432204	1092.99	0	Anaerobic
433824	5783.18	0	Anaerobic
435815	2118.65	0	Anaerobic
437390	2004.05	0	Anaerobic
437941	139.72	8.85e-18	Anaerobic
439621	3982.89	0	Anaerobic
440192	265.16	8.54e-58	Anaerobic
440695	1770.07	0	Anaerobic
442308	265.59	8.66e-44	Anaerobic
443002	276.02	1.24e-56	Anaerobic
443833	905.05	2.15E-312	Anaerobic
445893	333.27	9.19e-69	Anaerobic
453426	7967.86	0	Anaerobic
454206	8643.51	0	Anaerobic
455010	229.63	3.06e-40	Anaerobic
455857	1097.93	0	Anaerobic
456575	310.2	1.11e-56	Anaerobic
457277	425.26	2.01e-106	Anaerobic
458024	942.52	0	Anaerobic
459092	757.42	1.62e-264	Anaerobic
460563	3352.16	0	Anaerobic
461066	5575.52	0	Anaerobic
461579	198.76	4.35e-38	Anaerobic
464789	3078.08	0	Anaerobic
466599	144.69	9.11e-18	Anaerobic
467577	409.33	5.14e-135	Anaerobic
469998	301.23	9.61e-71	Anaerobic
474413	650.08	3.42e-176	Anaerobic
475628	7351.28	0	Anaerobic
476438	771.31	9.61e-226	Anaerobic
477836	211.18	1.25e-40	Anaerobic
479634	2163.26	0	Anaerobic
480095	3233.74	0	Anaerobic
485217	778.92	0	Anaerobic
485716	7811.9	0	Anaerobic
489407	175.83	4.07e-34	Anaerobic
490098	849.59	9.25E-312	Anaerobic
490539	11363.1	0	Anaerobic
491281	10157.9	0	Anaerobic
493116	303.54	3.07e-45	Anaerobic
496346	9308.29	0	Anaerobic
497199	387.36	5.94e-88	Anaerobic
499324	874.82	6.47e-289	Anaerobic
500447	441.3	1.25e-113	Anaerobic
500994	128.54	4.26e-27	Anaerobic
501712	224.21	4.96e-42	Anaerobic
502534	586.83	6.17e-245	Anaerobic
503979	167.46	6.52e-54	Anaerobic
505333	225.66	8.45e-32	Anaerobic
506436	3080.5	0	Anaerobic
507318	1747.43	0	Anaerobic
510805	1823.74	0	Anaerobic
513188	443.21	5.92e-139	Anaerobic
515102	322.79	3.45e-69	Anaerobic
518540	770.7	0	Anaerobic
519017	6407.11	0	Anaerobic
522387	216.01	6.8e-32	Anaerobic
526500	1424.5	0	Anaerobic
527503	613.15	3.55e-185	Anaerobic
528240	7883.6	0	Anaerobic
529257	277.79	2.83e-57	Anaerobic
532205	1236.64	0	Anaerobic
542386	170.01	1.75e-17	Anaerobic
542768	333.43	8.77e-71	Anaerobic
543362	155.75	4.67e-23	Anaerobic
543790	993.31	0	Anaerobic
550642	143.11	4.68e-11	Anaerobic
552366	3746.87	0	Anaerobic
553132	181.16	5.01e-24	Anaerobic
553725	2565.53	0	Anaerobic
555812	247.22	1.87e-51	Anaerobic
556236	452.38	8.94e-111	Anaerobic
557002	593.46	2.3e-165	Anaerobic
559008	269.22	5.7e-35	Anaerobic
559772	325.52	1.77e-74	Anaerobic
561086	312.39	6.79e-63	Anaerobic
563517	239.6	2.74e-141	Anaerobic
563926	7015.17	0	Anaerobic
564558	443.59	1.93e-115	Anaerobic
565312	774.5	5.73e-267	Anaerobic
567668	548.07	1.64e-208	Anaerobic
568079	180.19	1.68e-20	Anaerobic
568532	215.08	6.87e-33	Anaerobic
569938	836.83	2.36e-212	Anaerobic
570456	315.74	7.67e-131	Anaerobic
570858	917.15	0	Anaerobic
571542	1295.46	0	Anaerobic
573630	1031.24	0	Anaerobic
576057	1131.83	0	Anaerobic
576463	11981.7	0	Anaerobic
577338	175.42	8.25e-64	Anaerobic
578138	1778.32	0	Anaerobic
578917	696.81	0	Anaerobic
579332	146.95	1.52e-66	Anaerobic
581384	131.68	1.89e-17	Anaerobic
581783	436.02	1.43e-174	Anaerobic
582422	850.89	0	Anaerobic
582820	6341.63	0	Anaerobic
583726	286.76	8.61e-67	Anaerobic
584871	5391.81	0	Anaerobic
585950	267.35	2.55e-83	Anaerobic
590484	152.3	1.65e-16	Anaerobic
591752	857.15	4.45E-314	Anaerobic
592424	233.25	1.62e-33	Anaerobic
593417	129.76	2.02e-16	Anaerobic
594698	168.65	6.76e-37	Anaerobic
596330	265.32	6.14e-71	Anaerobic
601174	242.37	7.28e-43	Anaerobic
602748	223.16	1.12e-41	Anaerobic
603902	436.47	1.92e-159	Anaerobic
604672	188.28	1.29e-26	Anaerobic
605442	456.03	3.34e-137	Anaerobic
607012	2515.75	0	Anaerobic
618137	267.86	6.89e-35	Anaerobic
618607	133.83	2.47e-11	Anaerobic
621477	204.32	2.19e-40	Anaerobic
631018	201.75	1.24e-31	Anaerobic
631803	689.64	1.36e-239	Anaerobic
632743	622.6	1.55e-230	Anaerobic
633715	226.16	3.91e-51	Anaerobic
636521	485.5	7.99e-116	Anaerobic
636965	174.69	3.85e-37	Anaerobic
637872	1273.99	0	Anaerobic
641116	1363.55	0	Anaerobic
642651	237.13	1.38e-35	Anaerobic
643266	4304.89	0	Anaerobic
643714	294.55	9.77e-84	Anaerobic
644242	1478.45	0	Anaerobic
650810	552.12	2.63e-139	Anaerobic
651823	3578.88	0	Anaerobic
652578	149.42	2.14e-20	Anaerobic
655235	215.26	3.07e-62	Anaerobic
655742	682.97	4.22e-252	Anaerobic
656472	13337.4	0	Anaerobic
657200	687.33	1.81e-203	Anaerobic
658064	816.41	0	Anaerobic
658469	149.75	5.16e-58	Anaerobic
659537	1585.3	0	Anaerobic
659939	163.56	3.82e-45	Anaerobic
661533	2066.69	0	Anaerobic
661924	1555.75	0	Anaerobic
663219	1440.57	0	Anaerobic
664540	708.65	4.93e-273	Anaerobic
665549	165.4	2.33e-23	Anaerobic
667300	159.53	2.82e-28	Anaerobic
668301	2653.21	0	Anaerobic
670126	269.98	2.22e-54	Anaerobic
671412	166.91	1.05e-12	Anaerobic
672413	326.81	2.69e-90	Anaerobic
674064	13548.8	0	Anaerobic
675570	165.23	1.84e-19	Anaerobic
678159	293.41	2.9e-75	Anaerobic
678834	442.58	2.94e-87	Anaerobic
681617	198.98	3.54e-48	Anaerobic
682628	250.76	1.91e-38	Anaerobic
685852	210.37	2.28e-32	Anaerobic
690158	494.42	2.81e-129	Anaerobic
691090	641.47	5.19e-202	Anaerobic
692650	382.18	2.5e-92	Anaerobic
694225	4529.11	0	Anaerobic
695052	128.4	4.49e-14	Anaerobic
695876	2800.3	0	Anaerobic
696402	5555.46	0	Anaerobic
698424	144.66	2.49e-15	Anaerobic
699569	1234.79	0	Anaerobic
701079	1682.63	0	Anaerobic
705275	7568.79	0	Anaerobic
707168	172.03	1.05e-19	Anaerobic
708396	166.4	1.49e-20	Anaerobic
709313	215.9	1.01e-37	Anaerobic
709952	2698.91	0	Anaerobic
710738	2901.77	0	Anaerobic
711171	3721	0	Anaerobic
712160	4756.65	0	Anaerobic
714844	175.1	7.25e-21	Anaerobic
718350	439.43	2.51e-95	Anaerobic
720574	181.35	1.58e-29	Anaerobic
722966	183.17	6.02e-33	Anaerobic
723631	134.53	4.7e-36	Anaerobic
728299	1954.59	0	Anaerobic
738687	241.75	2.13e-40	Anaerobic
741895	900.9	0	Anaerobic
744381	194.55	1.06e-31	Anaerobic
745191	162.69	2.53e-47	Anaerobic
747040	664.83	3.03e-253	Anaerobic
748973	843.35	7.89e-276	Anaerobic
751633	146.89	1.14e-15	Anaerobic
753947	860.2	1.62e-289	Anaerobic
757277	761.39	2.45e-242	Anaerobic
765113	327.01	1.31e-54	Anaerobic
767997	149.92	3.04e-15	Anaerobic
769723	276.62	2.64e-106	Anaerobic
770509	5217.25	0	Anaerobic
771313	477.3	4.79e-115	Anaerobic
772658	168.36	7.86e-32	Anaerobic
773940	1385.87	0	Anaerobic
776934	417.69	2.43e-124	Anaerobic
777353	360.83	2.2e-118	Anaerobic
779738	19736	0	Anaerobic
781210	1737.8	0	Anaerobic
782380	135.5	7.76e-30	Anaerobic
784075	268.97	1.22e-66	Anaerobic
784826	5485.68	0	Anaerobic
786046	228.77	1.33e-55	Anaerobic
786871	372.88	1.73e-78	Anaerobic
788232	280.16	1.75e-71	Anaerobic
791384	574.91	2.71e-198	Anaerobic
793029	616.27	7.42e-201	Anaerobic
793896	3863.94	0	Anaerobic
797699	149.17	6.76e-36	Anaerobic
801095	325.63	2.84e-53	Anaerobic
802278	141.15	2.12e-15	Anaerobic
804458	175.57	1.7e-30	Anaerobic
806559	2064.16	0	Anaerobic
808526	1170.89	0	Anaerobic
812720	695.78	4.3e-248	Anaerobic
813256	347.33	1.47e-70	Anaerobic
816063	4817.62	0	Anaerobic
819095	183.79	2.02e-92	Anaerobic
819432	297.92	6.24e-86	Anaerobic
822141	138.86	4.66e-21	Anaerobic
823827	240.42	2.45e-40	Anaerobic
824531	195.7	7.79e-24	Anaerobic
829927	951.06	0	Anaerobic
831857	133.05	5.88e-62	Anaerobic
832238	307.41	3.33e-60	Anaerobic
835434	409.22	2.5e-157	Anaerobic
836694	462.44	5.37e-107	Anaerobic
837767	153.96	8.46e-20	Anaerobic
841537	435.75	8.4e-111	Anaerobic
848185	236.31	1.82e-61	Anaerobic
849642	1746.54	0	Anaerobic
850496	211.78	3.36e-46	Anaerobic
851939	3803.54	0	Anaerobic
852341	298.87	1.51e-147	Anaerobic
853981	407.08	1.68e-111	Anaerobic
855145	25716.1	0	Anaerobic
856837	406.11	1.43e-74	Anaerobic
859291	350.43	8.72e-71	Anaerobic
859920	156.23	1.6e-26	Anaerobic
865763	3606	0	Anaerobic
869389	821.71	0	Anaerobic
872130	12443.2	0	Anaerobic
877408	1921.73	0	Anaerobic
878532	171.89	2.43e-33	Anaerobic
879857	414.37	1.05e-147	Anaerobic
881435	133.18	5.04e-20	Anaerobic
881998	499.4	2.8e-158	Anaerobic
882721	733.68	0	Anaerobic
884152	2709.3	0	Anaerobic
886575	210.64	6.13e-35	Anaerobic
889119	2632.74	0	Anaerobic
890106	431.88	7.26e-109	Anaerobic
891161	143.57	7.48e-28	Anaerobic
892151	551.92	2.39e-166	Anaerobic
892875	354.86	3.8e-61	Anaerobic
897184	620.65	9.43e-173	Anaerobic
897705	766.18	1.45e-242	Anaerobic
899838	678.46	2.8e-204	Anaerobic
903005	2513.78	0	Anaerobic
903750	370.06	2.67e-105	Anaerobic
906019	2248.11	0	Anaerobic
908523	311.74	1.37e-67	Anaerobic
911637	284.64	1.33e-49	Anaerobic
914122	1519.29	0	Anaerobic
914510	622.62	5.35e-305	Anaerobic
915542	544.78	2.9e-184	Anaerobic
917926	866.63	0	Anaerobic
918332	13123.7	0	Anaerobic
920266	153.83	1.76e-21	Anaerobic
921503	315.55	1.56e-194	Anaerobic
921883	1725.2	0	Anaerobic
923857	132.3	1.15e-23	Anaerobic
925227	8778.94	0	Anaerobic
925702	5710.49	0	Anaerobic
926672	409.31	3.09e-115	Anaerobic
930221	941.02	6.24E-312	Anaerobic
931540	770.53	0	Anaerobic
932366	969.74	0	Anaerobic
937053	232.11	4.51e-80	Anaerobic
938598	5510.03	0	Anaerobic
939139	224.09	3.18e-40	Anaerobic
940050	880.7	7.79e-298	Anaerobic
945071	1944.35	0	Anaerobic
946156	410.11	5.06e-163	Anaerobic
947977	387.28	5.47e-134	Anaerobic
948827	284.81	1.47e-58	Anaerobic
949521	297.1	8.98e-61	Anaerobic
950448	865.66	1.41e-288	Anaerobic
952136	367.66	3.35e-100	Anaerobic
952872	1822.33	0	Anaerobic
953697	3244.42	0	Anaerobic
954040	3800.78	0	Anaerobic
954729	157.68	1.57e-17	Anaerobic
955902	1179.05	0	Anaerobic
956813	2740.76	0	Anaerobic
959332	140.84	2.7e-28	Anaerobic
960376	1227.2	0	Anaerobic
960937	22682.5	0	Anaerobic
961674	330.1	3.51e-78	Anaerobic
962580	170.03	2.41e-55	Anaerobic
962987	5085.31	0	Anaerobic
964164	590.35	3.54e-167	Anaerobic
965807	5506.86	0	Anaerobic
969875	1065.74	0	Anaerobic
970959	1360.49	0	Anaerobic
972707	1865.64	0	Anaerobic
973499	797.76	2.47e-283	Anaerobic
974730	150.21	3.74e-13	Anaerobic
980211	398.91	2.38e-152	Anaerobic
982253	2358.19	0	Anaerobic
982803	333.05	2.65e-130	Anaerobic
984457	210.6	1.69e-34	Anaerobic
984967	2549.45	0	Anaerobic
986307	1304.76	0	Anaerobic
986734	162.56	1.27e-58	Anaerobic
987376	140.97	7.16e-42	Anaerobic
988266	9367.77	0	Anaerobic
989642	4755.1	0	Anaerobic
990287	491.33	7.66e-153	Anaerobic
998326	152.49	5.35e-58	Anaerobic
998628	313.8	2.55e-98	Anaerobic
999486	189.22	1.14e-31	Anaerobic
1001183	142.04	7.51e-28	Anaerobic
1002187	981.68	0	Anaerobic
1003965	11432.4	0	Anaerobic
1005079	2162.85	0	Anaerobic
1005729	355.13	4.54e-101	Anaerobic
1006432	589.63	1.1e-204	Anaerobic
1006845	3413.74	0	Anaerobic
1008218	203.94	6.18e-41	Anaerobic
1014868	3215.32	0	Anaerobic
1015258	181.1	5.02e-156	Anaerobic
1015718	7486.1	0	Anaerobic
1017069	849.25	0	Anaerobic
1017560	1520.27	0	Anaerobic
1017955	639.89	1.22e-255	Anaerobic
1019397	5976.18	0	Anaerobic
1020198	152.78	3.36e-36	Anaerobic
1020886	135	4.16e-28	Anaerobic
1021548	147.58	8.86e-27	Anaerobic
1023652	475.33	9.78e-159	Anaerobic
1024221	255.89	4.06e-54	Anaerobic
1025205	135.54	1.24e-17	Anaerobic
1026248	684.87	1.21e-275	Anaerobic
1027116	154.07	2.12e-27	Anaerobic
1028083	548.91	5.72e-167	Anaerobic
1029213	843.58	0	Anaerobic
1029910	445.27	1.22e-129	Anaerobic
1031218	11709.1	0	Anaerobic
1036918	4123.32	0	Anaerobic
1039692	167.57	2.6e-39	Anaerobic
1042971	272.49	2.74e-46	Anaerobic
1045047	300.03	1.39e-63	Anaerobic
1049049	1051.82	0	Anaerobic
1049916	32467.4	0	Anaerobic
1050526	1633.9	0	Anaerobic
1051222	684.5	2.44e-227	Anaerobic
1051998	198.44	7.21e-41	Anaerobic
1053668	802.89	2.19e-272	Anaerobic
1055475	985.67	0	Anaerobic
1057201	142.9	3.32e-47	Anaerobic
1059758	348.84	9.15e-79	Anaerobic
1061629	140.27	6.1e-18	Anaerobic
1063038	774.33	0	Anaerobic
1067089	620.3	2.77e-194	Anaerobic
1068854	210.47	1.06e-40	Anaerobic
1070830	130.94	1.35e-19	Anaerobic
1078303	446.24	6.39e-185	Anaerobic
1082596	191.71	1.42e-23	Anaerobic
1085500	187.26	6.32e-28	Anaerobic
1088975	182.85	4.03e-66	Anaerobic
1089391	555.42	1.21e-168	Anaerobic
1091054	170.71	1.69e-57	Anaerobic
1091730	4309.75	0	Anaerobic
1092083	8622.15	0	Anaerobic
1092689	221.68	2.95e-57	Anaerobic
1095920	441.8	7.82e-118	Anaerobic
1097006	431.77	1.91e-277	Anaerobic
1098091	587.76	6.7e-256	Anaerobic
1098452	142.08	2.71e-68	Anaerobic
1099504	395.61	2.63e-126	Anaerobic
1100073	231.55	8.42e-41	Anaerobic
1102678	935.95	0	Anaerobic
1103659	141.65	1.67e-16	Anaerobic
1105523	165.66	2.44e-51	Anaerobic
1106498	212.46	4.19e-73	Anaerobic
1107424	154.11	6.6e-20	Anaerobic
1108504	6759.39	0	Anaerobic
1108908	138.86	1.31e-37	Anaerobic
1111087	209.78	1.59e-57	Anaerobic
1112873	808.98	1.05e-303	Anaerobic
1113241	141.56	2.21e-35	Anaerobic
1114777	998.21	0	Anaerobic
1115839	823.62	0	Anaerobic
1119810	387.7	3.24e-114	Anaerobic
1120239	458.26	3.78e-128	Anaerobic
1120724	188.45	2.13e-41	Anaerobic
1121087	376.8	1.07e-104	Anaerobic
1121867	1913.25	0	Anaerobic
1122369	793	0	Anaerobic
1124591	1762.12	0	Anaerobic
1127012	3198.57	0	Anaerobic
1128471	330.66	1.48e-94	Anaerobic
1129436	303.64	5.03e-66	Anaerobic
1140292	270.23	2.54e-73	Anaerobic
1143943	3257.64	0	Anaerobic
1145311	1412.02	0	Anaerobic
1145884	15756.1	0	Anaerobic
1147615	198.42	4.52e-89	Anaerobic
1147991	247.64	1.27e-64	Anaerobic
1150205	645.65	2.1e-266	Anaerobic
1150787	7720.54	0	Anaerobic
1152510	578.34	2.09e-173	Anaerobic
1153054	1735	0	Anaerobic
1154118	2353.02	0	Anaerobic
1155869	341.48	8.07e-89	Anaerobic
1156463	245.71	1.9e-80	Anaerobic
1156986	4314.16	0	Anaerobic
1157848	137.15	9.1e-45	Anaerobic
1158184	217.68	8.33e-52	Anaerobic
1159617	144.01	5.46e-23	Anaerobic
1161051	692.69	1.75e-202	Anaerobic
1164240	2701.32	0	Anaerobic
1165046	176.69	8.91e-23	Anaerobic
1167346	190.15	1.35e-41	Anaerobic
1168080	1074.62	0	Anaerobic
1169636	179.78	1.83e-29	Anaerobic
1173245	396.92	1.71e-125	Anaerobic
1174630	5513.75	0	Anaerobic
1177239	300.53	2.11e-79	Anaerobic
1179782	149.96	4.64e-22	Anaerobic
1180458	331.06	8.85e-79	Anaerobic
1182608	221.32	9.58e-32	Anaerobic
1184070	277.72	1.65e-52	Anaerobic
1184884	4833.35	0	Anaerobic
1187501	173.75	4.49e-66	Anaerobic
1189156	193.19	6.19e-46	Anaerobic
1189688	721.76	7.12e-242	Anaerobic
1190965	311.22	7.57e-98	Anaerobic
1191831	166.13	1.23e-31	Anaerobic
1193035	3578.31	0	Anaerobic
1194178	4486.13	0	Anaerobic
1196102	779.64	5.94e-221	Anaerobic
1197022	163.81	3.43e-14	Anaerobic
1197497	144.12	8.84e-14	Anaerobic
1200007	152.23	3.12e-35	Anaerobic
1200693	440.26	3.34e-156	Anaerobic
1202154	868.67	1.19e-271	Anaerobic
1203033	3755.46	0	Anaerobic
1207294	164.71	6.1e-19	Anaerobic
1209544	419.58	2.21e-140	Anaerobic
1212369	1122.97	0	Anaerobic
1213327	3555.18	0	Anaerobic
1214485	312.3	7.73e-82	Anaerobic
1215201	409.38	1.19e-84	Anaerobic
1216392	152.07	6.18e-17	Anaerobic
1217005	3023.03	0	Anaerobic
1217976	474.55	1.4e-157	Anaerobic
1219841	175.88	6.87e-69	Anaerobic
1220898	128.68	1.42e-12	Anaerobic
1221860	153.81	1.94e-25	Anaerobic
1222300	190.02	6.48e-42	Anaerobic
1222917	216.78	5.7e-86	Anaerobic
1223291	801.3	0	Anaerobic
1225375	3965.23	0	Anaerobic
1226336	889.97	1.79e-267	Anaerobic
1226907	528.41	7e-207	Anaerobic
1228019	1370.73	0	Anaerobic
1229308	405.03	1.41e-85	Anaerobic
1231666	139.24	3.54e-28	Anaerobic
1232274	1888.69	0	Anaerobic
1232966	132.26	2.75e-18	Anaerobic
1233987	2616.81	0	Anaerobic
1239401	626.55	3.05e-218	Anaerobic
1241308	644.17	1.41e-245	Anaerobic
1242351	6799.15	0	Anaerobic
1244287	299.17	2.95e-71	Anaerobic
1247166	165.29	1.33e-30	Anaerobic
1247571	311.96	1.31e-76	Anaerobic
1250142	469.36	1.05e-175	Anaerobic
1252418	231.38	3.94e-86	Anaerobic
1252925	258.13	2.54e-50	Anaerobic
1253508	169.02	1.31e-39	Anaerobic
1255540	3009.76	0	Anaerobic
1255947	143.96	1.93e-83	Anaerobic
1257098	1827.96	0	Anaerobic
1257751	274.21	2.68e-110	Anaerobic
1258106	205.07	5.75e-77	Anaerobic
1258787	216.58	1.15e-34	Anaerobic
1260263	227.49	3.03e-86	Anaerobic
1261410	4630.04	0	Anaerobic
1262889	3164.7	0	Anaerobic
1266395	2082.56	0	Anaerobic
1267919	129.85	2.49e-30	Anaerobic
1268551	1965.8	0	Anaerobic
1269106	2728.74	0	Anaerobic
1269641	1507.19	0	Anaerobic
1271135	400.63	6.58e-115	Anaerobic
1271641	200.44	2.69e-39	Anaerobic
1272479	131.91	1.94e-44	Anaerobic
1272965	628.4	0	Anaerobic
1273512	472.96	1.3e-134	Anaerobic
1275665	246.3	1.82e-46	Anaerobic
1277031	436.14	1.73e-154	Anaerobic
1278711	1241.99	0	Anaerobic
1279025	436.85	0	Anaerobic
1284367	257.78	2.46e-55	Anaerobic
1286878	2907.03	0	Anaerobic
1287991	1665.26	0	Anaerobic
1288395	473.03	6.19e-226	Anaerobic
1289364	429.99	1.06e-162	Anaerobic
1290071	269.35	4.38e-56	Anaerobic
1290532	341.45	3.47e-83	Anaerobic
1290994	166.1	8.66e-51	Anaerobic
1291635	236.02	9.06e-65	Anaerobic
1292182	2749.44	0	Anaerobic
1292713	1606.88	0	Anaerobic
1293713	574.62	5.33e-223	Anaerobic
1294566	133.8	3.26e-25	Anaerobic
1296467	285.1	2.88e-81	Anaerobic
1297532	5108.74	0	Anaerobic
1298698	17848.2	0	Anaerobic
1299743	127.2	3.22e-29	Anaerobic
1301500	168.79	4.4e-62	Anaerobic
1304882	487.74	7.43e-148	Anaerobic
1306790	6339.18	0	Anaerobic
1308417	1719.19	0	Anaerobic
1309067	764.74	0	Anaerobic
1310311	528.01	1.86e-147	Anaerobic
1311327	323.72	6.53e-104	Anaerobic
1311732	1197.58	0	Anaerobic
1314317	200.41	8.39e-30	Anaerobic
1321144	3930.44	0	Anaerobic
1321778	702.99	3.06e-304	Anaerobic
1322720	512.11	1.3e-164	Anaerobic
1323158	154.42	6.53e-29	Anaerobic
1324086	146.95	1.87e-74	Anaerobic
1324726	4339.1	0	Anaerobic
1326291	441.35	1.88e-129	Anaerobic
1327263	1436.4	0	Anaerobic
1328863	1304.84	0	Anaerobic
1330407	144.01	4.21e-16	Anaerobic
1331772	1431.27	0	Anaerobic
1333101	3251.71	0	Anaerobic
1336509	499.26	1.04e-153	Anaerobic
1337339	427.65	1.01e-175	Anaerobic
1337725	423.87	1e-133	Anaerobic
1338204	6710.48	0	Anaerobic
1339881	922.19	0	Anaerobic
1342660	1836.12	0	Anaerobic
1344796	319.74	9.32e-76	Anaerobic
1346493	325.91	3.44e-69	Anaerobic
1347140	710.75	0	Anaerobic
1348147	2511.93	0	Anaerobic
1349138	15644.6	0	Anaerobic
1349812	485.13	1.69e-110	Anaerobic
1353326	296.74	1.8e-57	Anaerobic
1355153	2702.59	0	Anaerobic
1355734	2311.04	0	Anaerobic
1359664	309.46	5.71e-87	Anaerobic
1366079	146.28	2.97e-29	Anaerobic
1366757	357.05	1.33e-82	Anaerobic
1367683	245.08	2.62e-59	Anaerobic
1375824	194.47	8.66e-27	Anaerobic
1381616	338.48	1.36e-167	Anaerobic
1384722	1301.69	0	Anaerobic
1386863	412.77	1.38e-168	Anaerobic
1388642	507.95	3.51e-176	Anaerobic
1390416	258.14	1.51e-105	Anaerobic
1391163	343.94	3.5e-111	Anaerobic
1392235	183.8	5.02e-26	Anaerobic
1393982	527.46	5.86e-155	Anaerobic
1395363	216.13	4.29e-52	Anaerobic
1396682	1056.2	0	Anaerobic
1397259	325.07	0	Anaerobic
1397587	2040.33	0	Anaerobic
1398305	478.26	1.48e-150	Anaerobic
1398648	143.75	1.28e-32	Anaerobic
1403981	1134.25	0	Anaerobic
1405079	161.42	4.65e-32	Anaerobic
1406009	414.77	1.33e-164	Anaerobic
1407163	25921	0	Anaerobic
1408888	231.5	1.37e-31	Anaerobic
1409460	915.66	0	Anaerobic
1411304	571.8	5.88e-154	Anaerobic
1412560	131.81	9.08e-26	Anaerobic
1415450	575.22	1.73e-157	Anaerobic
1416718	262.5	2.17e-56	Anaerobic
1417625	153.85	3.94e-30	Anaerobic
1418256	4323.1	0	Anaerobic
1419561	364.65	7.17e-91	Anaerobic
1421749	856.88	1.65e-297	Anaerobic
1423403	931.55	0	Anaerobic
1423966	290.63	1.09e-57	Anaerobic
1424994	270.85	8.11e-50	Anaerobic
1431222	197	1.67e-47	Anaerobic
1432588	1900.6	0	Anaerobic
1433122	482.97	2.13e-131	Anaerobic
1433659	1151.1	0	Anaerobic
1439050	1618.27	0	Anaerobic
1440941	443.72	2.37e-167	Anaerobic
1444369	143.29	1.72e-13	Anaerobic
1447694	128.6	1.12e-15	Anaerobic
1448245	179.89	4.83e-37	Anaerobic
1449151	170.78	1.96e-23	Anaerobic
1461586	704.77	6.11e-219	Anaerobic
1464069	506.07	9.97e-117	Anaerobic
1465775	244.12	1.23e-113	Anaerobic
1468553	1338.45	0	Anaerobic
1469349	1661.02	0	Anaerobic
1472649	254.55	8.62e-45	Anaerobic
1473099	396.31	2.76e-78	Anaerobic
1474533	263.09	1.09e-41	Anaerobic
1477634	134.43	3.7e-29	Anaerobic
1479648	183.23	2.73e-31	Anaerobic
1481045	343.84	4.31e-106	Anaerobic
1485200	1539.03	0	Anaerobic
1488781	6089.48	0	Anaerobic
1489379	142.5	2.43e-53	Anaerobic
1490151	4180.58	0	Anaerobic
1492107	848.89	1.76e-291	Anaerobic
1494805	570.94	8.91e-164	Anaerobic
1495439	159.8	1.13e-27	Anaerobic
1495861	278.77	6.74e-57	Anaerobic
1496928	409.57	2.38e-94	Anaerobic
1498109	756.98	5.8e-277	Anaerobic
1498515	344.74	1.4e-76	Anaerobic
1500751	833.99	0	Anaerobic
1501694	367.24	1.89e-85	Anaerobic
1504188	474.25	9.5e-137	Anaerobic
1504783	898.04	0	Anaerobic
1515273	1367.27	0	Anaerobic
1515665	1241.86	0	Anaerobic
1516880	759.13	3.36e-295	Anaerobic
1523640	947.29	0	Anaerobic
1525327	191.21	1.42e-21	Anaerobic
1527688	374.67	7.83e-164	Anaerobic
1528445	2313.23	0	Anaerobic
1531185	137.97	3.8e-20	Anaerobic
1533222	296.69	4.69e-53	Anaerobic
1540594	573.33	1.32e-174	Anaerobic
1544740	605.57	3.52e-187	Anaerobic
1545240	926.61	0	Anaerobic
1550041	221.34	2.86e-37	Anaerobic
1550736	421.88	7.29e-127	Anaerobic
1551698	202.36	1.56e-29	Anaerobic
1553766	475.77	4.25e-111	Anaerobic
1554603	630.85	8.93e-231	Anaerobic
1556692	448.66	5.07e-119	Anaerobic
1564612	166.68	2.21e-20	Anaerobic
1565334	177.63	2.15e-25	Anaerobic
1566866	302.47	1.23e-76	Anaerobic
1570091	3235.39	0	Anaerobic
1570498	484.23	1.93e-221	Anaerobic
1572605	242.24	1.75e-48	Anaerobic
1573880	289.5	9.82e-75	Anaerobic
1574757	146.67	8.08e-35	Anaerobic
1578699	129.47	2.4e-12	Anaerobic
1579548	284.44	2.7e-107	Anaerobic
1580383	160.39	2.24e-30	Anaerobic
1582431	179.23	2.92e-27	Anaerobic
1585116	128.02	3.29e-14	Anaerobic
1585741	128.1	1.31e-13	Anaerobic
1586164	231.9	6.62e-33	Anaerobic
1588160	186.87	3.38e-20	Anaerobic
1590521	141.12	3.87e-30	Anaerobic
1590890	268.58	3.32e-56	Anaerobic
1594097	311.98	5.05e-73	Anaerobic
1594693	135.23	9.2e-17	Anaerobic
1596756	256.75	5.31e-71	Anaerobic
1604118	412.87	1.06e-161	Anaerobic
1605317	206.56	2e-54	Anaerobic
1607064	892.7	0	Anaerobic
1608776	154.8	2.41e-15	Anaerobic
1609953	1142.32	0	Anaerobic
1611296	1395.38	0	Anaerobic
1612749	1375.76	0	Anaerobic
1615025	304.35	1.12e-75	Anaerobic
1616281	345.11	4.77e-97	Anaerobic
1617115	1722.76	0	Anaerobic
1619591	441.65	2.49e-148	Anaerobic
1620928	7341.08	0	Anaerobic
1624293	271.2	2.55e-75	Anaerobic
1625422	541.53	4.53e-226	Anaerobic
1625938	169.33	4.76e-86	Anaerobic
1626339	6172.39	0	Anaerobic
1627199	7828.53	0	Anaerobic
1629473	327.21	3.41e-89	Anaerobic
1630756	605.67	3.78e-274	Anaerobic
1632122	200.17	4.23e-57	Anaerobic
1635046	363.67	1.6e-71	Anaerobic
1635866	1209.6	0	Anaerobic
1636846	219.45	1.69e-28	Anaerobic
1638801	334.43	5.81e-75	Anaerobic
1639731	2305.8	0	Anaerobic
1640433	36735.4	0	Anaerobic
1640916	236.65	1.68e-53	Anaerobic
1642665	1035.76	0	Anaerobic
1643919	750.47	2.22e-295	Anaerobic
1644264	338.56	1.04e-114	Anaerobic
1645136	654.05	2.25e-305	Anaerobic
1645946	5406.19	0	Anaerobic
1647152	1062.8	0	Anaerobic
1649834	148.48	7.5e-37	Anaerobic
1650235	1385.45	0	Anaerobic
1651048	179.42	2.07e-38	Anaerobic
1652338	165.22	4.66e-24	Anaerobic
1653297	327.7	1.23e-96	Anaerobic
1653811	1916.26	0	Anaerobic
1654755	809.81	3.7e-267	Anaerobic
1655505	456.45	1.41e-144	Anaerobic
1656025	1420.76	0	Anaerobic
1657271	584.51	2.77e-228	Anaerobic
1658522	164.23	2.17e-21	Anaerobic
1659024	148.66	7.33e-19	Anaerobic
1659883	140.66	9.22e-16	Anaerobic
1662339	238.5	5.19e-63	Anaerobic
1663195	755.95	4.84e-255	Anaerobic
1665298	4000.57	0	Anaerobic
1666117	569.33	8.06e-230	Anaerobic
1666612	254.45	4.62e-70	Anaerobic
1667685	228.45	3.57e-41	Anaerobic
1668673	198.38	2.3e-40	Anaerobic
1669153	970.8	0	Anaerobic
1669949	283.98	6.53e-66	Anaerobic
1671788	1317.86	0	Anaerobic
1673358	567.65	1.62e-157	Anaerobic
1676050	1838.7	0	Anaerobic
1677491	386.75	2.54e-92	Anaerobic
1680164	5513.71	0	Anaerobic
1682200	181.61	1.54e-45	Anaerobic
1683205	146.43	3e-21	Anaerobic
1686094	269.95	8.17e-87	Anaerobic
1686567	1123.58	0	Anaerobic
1687837	505.57	2.34e-140	Anaerobic
1690532	154.76	4.83e-18	Anaerobic
1695109	1098.48	0	Anaerobic
1695493	185.82	2.12e-47	Anaerobic
1696290	348.85	3.4e-84	Anaerobic
1697475	337.72	4.08e-81	Anaerobic
1698873	403.22	3.03e-104	Anaerobic
1700226	3923.82	0	Anaerobic
1701658	322.93	4.11e-74	Anaerobic
1702522	1266.04	0	Anaerobic
1702834	9344.15	0	Anaerobic
1703232	3549.9	0	Anaerobic
1703772	3906.25	0	Anaerobic
1706483	179.2	5.5e-29	Anaerobic
1707676	470.48	3.79e-117	Anaerobic
1712363	618.53	3.41e-177	Anaerobic
1714580	382.41	1.47e-104	Anaerobic
1715307	8383.4	0	Anaerobic
1716068	468.07	2.35e-148	Anaerobic
1717817	5646.35	0	Anaerobic
1718287	399.74	1.99e-154	Anaerobic
1719060	13744.1	0	Anaerobic
1720717	413.62	1.27e-94	Anaerobic
1721475	418.42	4.38e-109	Anaerobic
1722168	288.75	2.49e-76	Anaerobic
1724029	733.29	2.52e-283	Anaerobic
1725165	430.14	2.6e-96	Anaerobic
1725838	504.8	4.37e-133	Anaerobic
1726353	587.99	2.38e-174	Anaerobic
1731367	364.43	2.01e-102	Anaerobic
1732411	2783.94	0	Anaerobic
1733350	2404.85	0	Anaerobic
1735714	12026.7	0	Anaerobic
1736690	225.33	7.26e-45	Anaerobic
1737895	168.33	1.86e-34	Anaerobic
1739233	7358.23	0	Anaerobic
1740158	127.17	6.13e-44	Anaerobic
1741405	4014.02	0	Anaerobic
1743259	166.73	1.12e-26	Anaerobic
1744445	4017.77	0	Anaerobic
1745175	209.13	2.53e-48	Anaerobic
1746554	503.2	5.23e-165	Anaerobic
1748810	183.41	1.65e-25	Anaerobic
1752666	373.75	6.39e-81	Anaerobic
1753092	129.87	3.95e-114	Anaerobic
1753480	4159.69	0	Anaerobic
1754081	205.4	8.53e-33	Anaerobic
1755432	11806.1	0	Anaerobic
1757213	266.98	1.73e-46	Anaerobic
1757634	515.14	3.25e-167	Anaerobic
1759261	175.56	4.71e-24	Anaerobic
1759685	634.73	1.86e-202	Anaerobic
1760930	419.69	2.2e-121	Anaerobic
1762779	480.92	5.72e-142	Anaerobic
1763181	4718.93	0	Anaerobic
1764233	154.96	3.2e-22	Anaerobic
1766951	992.18	0	Anaerobic
1767958	1348	0	Anaerobic
1775233	938.64	0	Anaerobic
1776392	168.94	3.12e-26	Anaerobic
1782640	132.07	1.34e-10	Anaerobic
1785170	205.02	2.01e-69	Anaerobic
1785489	244.68	1.07e-66	Anaerobic
1786379	2194.33	0	Anaerobic
1787183	140.39	7.61e-18	Anaerobic
1789284	350.28	3.74e-99	Anaerobic
1790238	1585.83	0	Anaerobic
1790766	873.98	3.47E-313	Anaerobic
1791677	270.35	2.26e-79	Anaerobic
1793194	409.02	2.44e-108	Anaerobic
1793739	1480.89	0	Anaerobic
1796572	149.9	1.89e-23	Anaerobic
1797321	10957.6	0	Anaerobic
1798424	461.21	4.1e-291	Anaerobic
1798845	18974.2	0	Anaerobic
1799361	1372.65	0	Anaerobic
1799796	262.02	4.67e-55	Anaerobic
1800758	3083.02	0	Anaerobic
1803162	215.99	2.53e-47	Anaerobic
1804188	3775.53	0	Anaerobic
1805802	181.33	1.53e-53	Anaerobic
1807356	1303.63	0	Anaerobic
1808905	2923.18	0	Anaerobic
1809755	213.1	1.9e-36	Anaerobic
1811734	2424.96	0	Anaerobic
1815420	198.67	6.67e-35	Anaerobic
1819784	205.48	6.12e-29	Anaerobic
1820446	4306.39	0	Anaerobic
1821505	604.37	5.13e-194	Anaerobic
1823223	158.06	3.7e-31	Anaerobic
1823860	252.59	6.22e-40	Anaerobic
1830411	725.79	2.55e-228	Anaerobic
1831375	2359.51	0	Anaerobic
1833340	1212.01	0	Anaerobic
1837466	1227.57	0	Anaerobic
1839492	915.58	0	Anaerobic
1840333	2214.31	0	Anaerobic
1842066	337.36	3.17e-67	Anaerobic
1842516	152.28	4.29e-17	Anaerobic
1846063	853.28	4.49E-318	Anaerobic
1846806	571.16	1.97e-198	Anaerobic
1848862	1837.31	0	Anaerobic
1852663	268.71	1.59e-96	Anaerobic
1853422	134.93	6.25e-14	Anaerobic
1859855	273.72	1.25e-59	Anaerobic
1860757	9514.77	0	Anaerobic
1864541	822.6	7.64e-263	Anaerobic
1867850	144.99	1.65e-22	Anaerobic
1868507	257.35	1.07e-77	Anaerobic
1869297	869.11	6.44e-279	Anaerobic
1869996	1633.25	0	Anaerobic
1871139	886.83	0	Anaerobic
1871563	671.89	3.3e-209	Anaerobic
1872844	278.14	6.7e-51	Anaerobic
1873616	374.05	4.26e-104	Anaerobic
1875094	154.02	1.19e-48	Anaerobic
1875579	1425.83	0	Anaerobic
1876182	349.9	2.79e-80	Anaerobic
1876824	764.25	6.04e-298	Anaerobic
1878836	900.79	0	Anaerobic
1880681	170.22	1.87e-24	Anaerobic
1881160	289.36	6.9e-57	Anaerobic
1884567	265.43	2.33e-90	Anaerobic
1885093	173.43	7.65e-25	Anaerobic
1886077	556.66	4.98e-143	Anaerobic
1888009	168.34	2.64e-24	Anaerobic
1889331	2047.47	0	Anaerobic
1890718	137.83	1.66e-17	Anaerobic
1891291	655.7	5.18e-254	Anaerobic
1891820	440.39	5.04e-205	Anaerobic
1892792	841.04	3.46e-293	Anaerobic
1893264	209.71	2.55e-38	Anaerobic
1893676	131.23	7.74e-20	Anaerobic
1894161	182.34	8.04e-28	Anaerobic
1897989	150.96	7.04e-16	Anaerobic
1899248	146.1	4.1e-16	Anaerobic
1899795	1359.83	0	Anaerobic
1901262	431.39	1.28e-153	Anaerobic
1902775	469.35	8.11e-132	Anaerobic
1903493	1213.76	0	Anaerobic
1904493	254.27	6.16e-77	Anaerobic
1905103	2068.39	0	Anaerobic
1905636	2589.95	0	Anaerobic
1906176	1319.1	0	Anaerobic
1906584	1006.46	0	Anaerobic
1908173	1292.97	0	Anaerobic
1909964	455.08	6.48e-127	Anaerobic
1910655	383.46	4.45e-111	Anaerobic
1911342	238.08	4.72e-58	Anaerobic
1911915	2066.5	0	Anaerobic
1912778	428.69	6.73e-89	Anaerobic
1913603	1840.59	0	Anaerobic
1914179	5210.07	0	Anaerobic
1915751	1053.84	0	Anaerobic
1918219	1737.21	0	Anaerobic
1918970	1107.45	0	Anaerobic
1920122	752.56	1.05e-301	Anaerobic
1921097	2296.72	0	Anaerobic
1921702	181.73	3.38e-48	Anaerobic
1923323	4792.32	0	Anaerobic
1924128	4981.52	0	Anaerobic
1926908	210.95	1.18e-36	Anaerobic
1927818	216.59	4.14e-66	Anaerobic
1928804	791.47	0	Anaerobic
1931124	568.27	1.21e-166	Anaerobic
1932738	457.91	1.95e-81	Anaerobic
1934399	1546.51	0	Anaerobic
1934905	564.6	8.42e-257	Anaerobic
1935525	10496.5	0	Anaerobic
1938245	436.23	1.24e-106	Anaerobic
1940106	510.33	1.73e-141	Anaerobic
1940638	577.92	8.33e-198	Anaerobic
1943471	194.51	1.58e-31	Anaerobic
1944099	1875.92	0	Anaerobic
1944824	131.6	4.7e-12	Anaerobic
1945478	200.33	6.05e-33	Anaerobic
1946781	206.44	4.78e-49	Anaerobic
1948653	15315.7	0	Anaerobic
1950262	1335.53	0	Anaerobic
1950690	160.49	2.19e-67	Anaerobic
1955119	1727.98	0	Anaerobic
1958021	3312.76	0	Anaerobic
1959664	201.1	5.68e-41	Anaerobic
1960137	328.57	9.55e-79	Anaerobic
1960656	3359.13	0	Anaerobic
1961989	617.19	5.95e-196	Anaerobic
1970284	151.75	1.74e-23	Anaerobic
1972700	352.11	1.02e-86	Anaerobic
1973458	912.31	0	Anaerobic
1975348	251.48	1.11e-38	Anaerobic
1976374	392.98	6.55e-190	Anaerobic
1977396	198.09	5.1e-99	Anaerobic
1977757	355.88	6.81e-131	Anaerobic
1978725	2098.51	0	Anaerobic
1980579	832.06	4.32E-320	Anaerobic
1982052	197.86	1.96e-33	Anaerobic
1982483	195.58	1.24e-31	Anaerobic
1984820	3136.67	0	Anaerobic
1986022	456.21	7.84e-289	Anaerobic
1986700	1086.14	0	Anaerobic
1987525	4108.58	0	Anaerobic
1990200	8514.68	0	Anaerobic
1990864	1638.89	0	Anaerobic
1992442	199.03	3.94e-42	Anaerobic
1992899	344.73	1.75e-85	Anaerobic
1993417	3625.71	0	Anaerobic
1993828	604.06	8.14e-210	Anaerobic
1994914	551.45	1.33e-216	Anaerobic
1997615	435.18	6.46e-150	Anaerobic
1998002	282.33	2.19e-69	Anaerobic
1998428	1372.62	0	Anaerobic
1998900	138.09	1.18e-41	Anaerobic
2000893	1583.71	0	Anaerobic
2005247	149.83	2.31e-23	Anaerobic
2006131	3652.07	0	Anaerobic
2007188	166.76	1.79e-23	Anaerobic
2007654	229.32	4.58e-49	Anaerobic
2010209	309.32	1.11e-58	Anaerobic
2021306	155.98	9.05e-19	Anaerobic
2022880	165.09	7.56e-38	Anaerobic
2023330	4223.46	0	Anaerobic
2024035	183.53	1.34e-23	Anaerobic
2026206	1025.82	0	Anaerobic
2027411	2125.49	0	Anaerobic
2030371	725.53	1e-272	Anaerobic
2031068	171.25	2.17e-30	Anaerobic
2031487	2112.8	0	Anaerobic
2033229	241.69	1.25e-66	Anaerobic
2036059	128.23	2.66e-17	Anaerobic
2036848	295.39	1.51e-68	Anaerobic
2037448	184.72	1.38e-31	Anaerobic
2037791	152.29	7.01e-36	Anaerobic
2038880	250.2	2.39e-77	Anaerobic
2041602	2439.88	0	Anaerobic
2042549	2737.84	0	Anaerobic
2047178	188.31	1.85e-36	Anaerobic
2049417	501.05	1.36e-185	Anaerobic
2050027	2966.47	0	Anaerobic
2051129	181.51	2.92e-21	Anaerobic
2051584	1786.68	0	Anaerobic
2053059	339.67	1.3e-75	Anaerobic
2054812	1123.53	0	Anaerobic
2056134	2000.72	0	Anaerobic
2056934	245.26	1.76e-47	Anaerobic
2057853	12081.7	0	Anaerobic
2058968	186.89	1.67e-35	Anaerobic
2060260	5369.67	0	Anaerobic
2060756	273.32	7.49e-117	Anaerobic
2061229	398.13	2.82e-128	Anaerobic
2063908	618.41	5.11e-201	Anaerobic
2065486	398.42	1.05e-168	Anaerobic
2066008	7712.27	0	Anaerobic
2066494	1949.32	0	Anaerobic
2072764	345.91	6.75e-74	Anaerobic
2073864	1080.9	0	Anaerobic
2075509	240.53	3.42e-36	Anaerobic
2076051	275.85	1.57e-88	Anaerobic
2077474	995.67	0	Anaerobic
2079179	401.09	5.9e-146	Anaerobic
2080177	135.98	3.08e-15	Anaerobic
2080749	302.03	1.33e-77	Anaerobic
2083565	689.85	2.87e-232	Anaerobic
2085295	2538.32	0	Anaerobic
2086582	559.26	1.62e-219	Anaerobic
2087119	159.97	0	Anaerobic
2087420	2116.47	0	Anaerobic
2087996	15702.9	0	Anaerobic
2091424	140.5	1.57e-15	Anaerobic
2094625	469.14	3.54e-134	Anaerobic
2095434	127.08	7.67e-28	Anaerobic
2096351	2711.8	0	Anaerobic
2097752	973.51	0	Anaerobic
2099301	441.77	1.01e-211	Anaerobic
2099685	2652.33	0	Anaerobic
2100995	161.5	5.93e-48	Anaerobic
2103243	520.69	1.2e-193	Anaerobic
2104981	178.73	1.37e-21	Anaerobic
2106351	269.83	8.42e-41	Anaerobic
2107435	257.74	3.95e-45	Anaerobic
2108048	527.75	9.25e-145	Anaerobic
2109294	732	1.33e-234	Anaerobic
2111268	9060.32	0	Anaerobic
2111938	288.74	1.87e-114	Anaerobic
2112367	4585.87	0	Anaerobic
2113236	345.9	1.09e-84	Anaerobic
2114856	130.52	9.7e-16	Anaerobic
2121019	355.44	4.45e-98	Anaerobic
2126592	363.92	6.69e-88	Anaerobic
2135896	311.51	3.38e-55	Anaerobic
2137648	260.45	1.01e-53	Anaerobic
2140297	1275.53	0	Anaerobic
2141024	888.92	0	Anaerobic
2145664	158.79	1.28e-31	Anaerobic
2148403	171.58	1.54e-24	Anaerobic
2151328	276.25	0	Anaerobic
2151663	5052.81	0	Anaerobic
2157239	1072.1	0	Anaerobic
2159191	364.8	8.43e-78	Anaerobic
2161137	133.05	2.79e-13	Anaerobic
2162288	235.7	3.56e-45	Anaerobic
2163223	577.84	2.49e-216	Anaerobic
2163621	5330.9	0	Anaerobic
2165141	1739.16	0	Anaerobic
2167748	131.56	1.04e-11	Anaerobic
2169753	483.66	2.03e-161	Anaerobic
2172509	752.7	2.4e-242	Anaerobic
2175251	5097.73	0	Anaerobic
2180827	267.29	1.06e-49	Anaerobic
2181407	356.23	2.65e-111	Anaerobic
2181730	150.22	1.95e-53	Anaerobic
2183471	2154.18	0	Anaerobic
2183875	160.39	2.5e-73	Anaerobic
2184937	517.34	2.18e-154	Anaerobic
2188141	137.18	3.84e-14	Anaerobic
2190736	1226.97	0	Anaerobic
2192282	4229.37	0	Anaerobic
2194789	463.7	2.62e-114	Anaerobic
2195200	367.9	2.7e-87	Anaerobic
2199282	163.92	5.59e-39	Anaerobic
2201398	1130.71	0	Anaerobic
2202427	347.8	9.88e-85	Anaerobic
2209629	275.12	6.36e-39	Anaerobic
2210240	2652.94	0	Anaerobic
2212690	937.34	0	Anaerobic
2213682	235.01	6.61e-52	Anaerobic
2220058	2985.2	0	Anaerobic
2222958	754.81	7.66e-254	Anaerobic
2223822	139.58	1.83e-19	Anaerobic
2227120	367.99	2.78e-138	Anaerobic
2228438	426.49	1.03e-116	Anaerobic
2229846	360.31	5.29e-102	Anaerobic
2230868	1527.55	0	Anaerobic
2231307	431.43	7.62e-120	Anaerobic
2231983	163.81	2.29e-30	Anaerobic
2233123	1130.9	0	Anaerobic
2236360	970.03	4.23E-310	Anaerobic
2241754	1803.8	0	Anaerobic
2242611	175.58	9.59e-30	Anaerobic
2246592	2324.85	0	Anaerobic
2247770	577.08	2.47e-217	Anaerobic
2248833	3039.95	0	Anaerobic
2255211	145.41	4.62e-33	Anaerobic
2258461	623.84	6.3e-208	Anaerobic
2261852	818.91	0	Anaerobic
2262855	517.38	3.83e-135	Anaerobic
2263431	1195.57	0	Anaerobic
2264103	158.44	4.76e-23	Anaerobic
2265775	160.53	1.91e-34	Anaerobic
2267837	19041.5	0	Anaerobic
2268698	1090.62	0	Anaerobic
2269828	178.87	4.84e-23	Anaerobic
2270344	502.09	1.27e-150	Anaerobic
2273202	419.1	8.75e-109	Anaerobic
2275197	162.04	2.13e-22	Anaerobic
2275801	1696.72	0	Anaerobic
2278567	3101.96	0	Anaerobic
2280452	15681.7	0	Anaerobic
2282128	3665.32	0	Anaerobic
2284231	9714.6	0	Anaerobic
2286043	377.08	1.63e-241	Anaerobic
2288443	1058.5	0	Anaerobic
2289202	365.33	3.49e-135	Anaerobic
2292952	288.42	3.23e-66	Anaerobic
2295920	476.13	3.3e-196	Anaerobic
2296269	1147.81	0	Anaerobic
2301577	204.25	1.92e-41	Anaerobic
2303109	216.92	3.45e-36	Anaerobic
2305639	142.79	1.42e-15	Anaerobic
2308450	156.02	9.05e-15	Anaerobic
2309649	236.96	7.5e-58	Anaerobic
2310843	5073.78	0	Anaerobic
2311472	1553.98	0	Anaerobic
2313662	1815.68	0	Anaerobic
2314067	329.13	2.82e-255	Anaerobic
2314925	164.01	1.08e-17	Anaerobic
2317935	426.45	7.49e-113	Anaerobic
2325988	429.01	5e-105	Anaerobic
2329505	479.76	1.23e-115	Anaerobic
2331320	259.76	1.26e-39	Anaerobic
2331923	127.18	3.15e-16	Anaerobic
2334800	12633.4	0	Anaerobic
2336686	257.9	3.41e-63	Anaerobic
2337492	10518.1	0	Anaerobic
2338135	174.22	7.77e-41	Anaerobic
2339216	153.22	4.89e-26	Anaerobic
2339749	207.44	5.99e-34	Anaerobic
2340513	567.37	2.22e-200	Anaerobic
2340931	172.24	9.5e-37	Anaerobic
2341575	345.59	8.22e-80	Anaerobic
2342779	158.12	2.03e-22	Anaerobic
2345097	380.93	4.25e-85	Anaerobic
2345798	712.52	7.31e-227	Anaerobic
2347952	4762.22	0	Anaerobic
2353321	207.89	1.14e-35	Anaerobic
2355576	478.66	1.43e-150	Anaerobic
2355938	314.48	9.27e-96	Anaerobic
2357554	173.56	2.52e-25	Anaerobic
2361675	450.41	1.84e-103	Anaerobic
2362543	297.45	3.65e-117	Anaerobic
2363091	230.72	4.68e-35	Anaerobic
2363875	6290.76	0	Anaerobic
2367213	402.5	1.61e-99	Anaerobic
2367711	142.49	1.28e-16	Anaerobic
2371578	600.66	5.98e-191	Anaerobic
2377297	321.6	2.42e-108	Anaerobic
2378682	4303.38	0	Anaerobic
2379590	698.4	2.37e-218	Anaerobic
2383429	282.04	4.67e-60	Anaerobic
2384566	158.5	6.02e-25	Anaerobic
2386800	304.08	1.85e-64	Anaerobic
2387226	148.56	2.36e-48	Anaerobic
2388058	220.34	4.14e-39	Anaerobic
2389458	191.19	1.63e-36	Anaerobic
2399798	504.95	3.94e-183	Anaerobic
2402621	220.3	4.27e-60	Anaerobic
2403389	4843.64	0	Anaerobic
2403834	145.84	4.4e-35	Anaerobic
2404669	518.73	0	Anaerobic
2405110	6510.49	0	Anaerobic
2405535	702.42	7.02e-254	Anaerobic
2406111	148.76	1.35e-31	Anaerobic
2406863	599.11	8.92e-148	Anaerobic
2409413	488.75	2.95e-152	Anaerobic
2410662	1610.5	0	Anaerobic
2411411	8249.74	0	Anaerobic
2411831	248.86	5.89e-247	Anaerobic
2412517	444.09	4.63e-142	Anaerobic
2415077	2359.63	0	Anaerobic
2417249	735.73	1.31e-231	Anaerobic
2417840	1195.29	0	Anaerobic
2418529	180.46	3.24e-25	Anaerobic
2419328	538.98	8.27e-179	Anaerobic
2420898	196.26	1.02e-26	Anaerobic
2422793	813.92	1.35e-265	Anaerobic
2424873	435.83	5.17e-101	Anaerobic
2426652	127.44	8.98e-18	Anaerobic
2427661	206.13	3.31e-35	Anaerobic
2428834	837.73	2.15e-304	Anaerobic
2429950	426.87	2.53e-151	Anaerobic
2432022	3185.29	0	Anaerobic
2433337	411.81	1.37e-112	Anaerobic
2434926	277.81	1.22e-69	Anaerobic
2435902	2056.02	0	Anaerobic
2438258	4929.25	0	Anaerobic
2439259	137.46	1.06e-37	Anaerobic
2439664	3583.19	0	Anaerobic
2442299	152.24	3.19e-37	Anaerobic
2443344	389.08	1.04e-103	Anaerobic
2445653	699.13	1.78e-251	Anaerobic
2446485	1361.17	0	Anaerobic
2447729	1670.41	0	Anaerobic
2452705	182.79	7.96e-26	Anaerobic
2454035	676.7	0	Anaerobic
2454338	291.51	5.59e-174	Anaerobic
2454934	4408.23	0	Anaerobic
2455396	157.42	1.23e-19	Anaerobic
2458992	751.27	2.02e-226	Anaerobic
2461465	667	4.76e-170	Anaerobic
2463156	457.58	7.19e-132	Anaerobic
2464343	4367.6	0	Anaerobic
2465272	213.12	1.29e-43	Anaerobic
2465856	14689.6	0	Anaerobic
2466635	422.33	6e-95	Anaerobic
2468685	1001.41	0	Anaerobic
2473668	405.58	9.23e-86	Anaerobic
2474398	2436.94	0	Anaerobic
2480575	337.33	4.83e-61	Anaerobic
2481668	8214.18	0	Anaerobic
2482361	292.86	3.33e-69	Anaerobic
2483871	172.64	5.68e-16	Anaerobic
2485149	133.35	2.93e-43	Anaerobic
2486767	135.29	5.06e-18	Anaerobic
2488328	773.86	8.33e-260	Anaerobic
2491596	131.07	1.34e-12	Anaerobic
2492921	322.99	5.84e-96	Anaerobic
2493523	4975.14	0	Anaerobic
2494801	1297.89	0	Anaerobic
2496332	861.09	0	Anaerobic
2496672	3214.64	0	Anaerobic
2497978	168.19	7.53e-20	Anaerobic
2499131	712.95	3.47e-266	Anaerobic
2507466	402.57	1.55e-93	Anaerobic
2508086	314.61	8.99e-75	Anaerobic
2508974	182.6	1.48e-28	Anaerobic
2511038	882.83	0	Anaerobic
2513791	208.52	6.61e-59	Anaerobic
2515885	307.6	4.23e-192	Anaerobic
2516276	5554.56	0	Anaerobic
2517233	1064.83	0	Anaerobic
2518929	8732.62	0	Anaerobic
2519859	161.16	1.11e-22	Anaerobic
2521814	170.05	1.57e-43	Anaerobic
2523224	200.46	2.56e-21	Anaerobic
2523960	516.27	2.76e-162	Anaerobic
2524997	877.5	1.51e-288	Anaerobic
2528266	261.36	8.46e-64	Anaerobic
2529304	5667.27	0	Anaerobic
2530399	7716.35	0	Anaerobic
2531513	9702.25	0	Anaerobic
2532864	326.6	2.09e-100	Anaerobic
2533511	1227.3	0	Anaerobic
2534308	162.62	3.62e-31	Anaerobic
2535291	157.07	7.14e-32	Anaerobic
2535818	189.9	1.51e-51	Anaerobic
2537714	966.81	2.59e-284	Anaerobic
2541597	2290.44	0	Anaerobic
2542195	1590.34	0	Anaerobic
2542689	695.86	3.69e-205	Anaerobic
2547620	685.84	2.81e-212	Anaerobic
2548593	1099.96	0	Anaerobic
2549361	173.34	1.02e-27	Anaerobic
2550200	11287.3	0	Anaerobic
2550867	167.56	2.64e-22	Anaerobic
2555342	7087.36	0	Anaerobic
2556802	339.09	9.54e-81	Anaerobic
2558384	4398.52	0	Anaerobic
2559064	169.03	9.75e-26	Anaerobic
2561688	280.24	2.67e-62	Anaerobic
2562146	151.04	2.63e-88	Anaerobic
2563238	372.37	6.12e-115	Anaerobic
2576819	191.7	8.63e-38	Anaerobic
2580527	252.85	3.63e-49	Anaerobic
2580897	207.63	3.97e-36	Anaerobic
2581511	1021.35	0	Anaerobic
2583605	1903.83	0	Anaerobic
2585502	596.76	2.63e-209	Anaerobic
2587387	308.86	4.24e-63	Anaerobic
2588887	1558.58	0	Anaerobic
2589585	2299.22	0	Anaerobic
2590542	361.82	9.57e-90	Anaerobic
2593925	783.45	1.83e-253	Anaerobic
2594798	511.4	2.21e-159	Anaerobic
2595797	2603.92	0	Anaerobic
2596408	127.67	1.48e-15	Anaerobic
2597365	1503.32	0	Anaerobic
2597816	5180.88	0	Anaerobic
2598471	743.06	1.12e-228	Anaerobic
2604961	635.7	5.84e-177	Anaerobic
2612464	173.41	1.22e-37	Anaerobic
2613938	4495.38	0	Anaerobic
2616821	5607.94	0	Anaerobic
2618128	157.62	3.73e-38	Anaerobic
2618935	26097.9	0	Anaerobic
2620288	457.84	2.02e-120	Anaerobic
2621007	1023.41	0	Anaerobic
2624406	186.94	2.45e-31	Anaerobic
2624930	252.47	7.78e-41	Anaerobic
2625957	151.54	1.59e-22	Anaerobic
2626572	691.77	3.68e-276	Anaerobic
2627279	11932.7	0	Anaerobic
2628233	178.43	6.18e-38	Anaerobic
2628941	138.36	5.81e-13	Anaerobic
2630730	843.16	3.95E-323	Anaerobic
2632206	39541.5	0	Anaerobic
2633766	246.76	5.46e-38	Anaerobic
2635521	308.14	3.1e-108	Anaerobic
2636751	148.49	1.95e-24	Anaerobic
2638659	803.65	1.01e-252	Anaerobic
2641002	2686.28	0	Anaerobic
2642395	3075.92	0	Anaerobic
2643230	338.78	6.77e-114	Anaerobic
2647222	208.65	6.81e-27	Anaerobic
2650372	811.58	0	Anaerobic
2651467	2597.63	0	Anaerobic
2651795	2003.72	0	Anaerobic
2657012	166.82	7.45e-18	Anaerobic
2658164	648.67	5.9e-217	Anaerobic
2660234	1432.09	0	Anaerobic
2661415	10809.3	0	Anaerobic
2663145	439.96	1.9e-90	Anaerobic
2665042	752.26	8.97e-273	Anaerobic
2667526	927.93	0	Anaerobic
2670664	346.5	4.63e-64	Anaerobic
2676531	819.45	4.44e-247	Anaerobic
2677348	143.7	2.34e-12	Anaerobic
2682105	394.41	2.95e-86	Anaerobic
2683589	2886.55	0	Anaerobic
2685043	189.34	2.53e-34	Anaerobic
2685459	2137.4	0	Anaerobic
2687133	155.07	3.66e-22	Anaerobic
2687574	176.11	8.02e-31	Anaerobic
2687954	241.65	7.73e-53	Anaerobic
2689350	1553.53	0	Anaerobic
2693612	1853.54	0	Anaerobic
2694564	192.73	1.64e-34	Anaerobic
2695915	1404.73	0	Anaerobic
2696611	448.3	3.13e-143	Anaerobic
2697646	3395.37	0	Anaerobic
2698079	592.38	1.05e-225	Anaerobic
2698560	1286.03	0	Anaerobic
2699809	273.36	9.4e-41	Anaerobic
2700502	190.21	1.57e-28	Anaerobic
2701351	129.25	1.09e-11	Anaerobic
2702257	3706.18	0	Anaerobic
2705228	6456.01	0	Anaerobic
2707041	651.15	9.94e-251	Anaerobic
2708236	997.62	0	Anaerobic
2710897	1006.81	0	Anaerobic
2712474	129.68	3.12e-16	Anaerobic
2713335	220.44	6e-48	Anaerobic
2713708	402.94	8.25e-140	Anaerobic
2714544	257.53	7.59e-125	Anaerobic
2716106	403.84	4.43e-101	Anaerobic
2716577	1348.94	0	Anaerobic
2717219	10158.8	0	Anaerobic
2720695	13085.9	0	Anaerobic
2721981	445.28	5.34e-116	Anaerobic
2722597	551.32	4.39e-164	Anaerobic
2723847	3206.37	0	Anaerobic
2727426	343.59	2.12e-205	Anaerobic
2729050	234.36	4.8e-153	Anaerobic
2729507	12193.6	0	Anaerobic
2732310	1813.77	0	Anaerobic
2734110	4715.11	0	Anaerobic
2734989	12689.4	0	Anaerobic
2735593	4554.63	0	Anaerobic
2736551	338.64	1.53e-61	Anaerobic
2737570	732.57	1.85e-228	Anaerobic
2739221	1354.67	0	Anaerobic
2739838	2964.24	0	Anaerobic
2740848	363.25	6.17e-85	Anaerobic
2741621	477.4	1.78e-152	Anaerobic
2744288	44796.6	0	Anaerobic
2745941	6203.86	0	Anaerobic
2746662	638.45	9.49e-196	Anaerobic
2748750	675.97	6.66e-238	Anaerobic
2749796	154	5.03e-34	Anaerobic
2751586	2517.1	0	Anaerobic
2752771	3086.38	0	Anaerobic
2753608	15049.4	0	Anaerobic
2754156	2045.76	0	Anaerobic
2755412	195.72	1.59e-27	Anaerobic
2755949	133.57	1.25e-11	Anaerobic
2756673	221.23	3.81e-29	Anaerobic
2757330	172.95	1.45e-15	Anaerobic
2758795	170.14	1.53e-16	Anaerobic
2759273	1834.42	0	Anaerobic
2759745	223.86	4.08e-25	Anaerobic
2761944	162.46	9.2e-31	Anaerobic
2763358	900.57	0	Anaerobic
2763928	1566.22	0	Anaerobic
2764659	11439.5	0	Anaerobic
2765420	1479.5	0	Anaerobic
2769838	597.23	1.25e-200	Anaerobic
2770224	349.5	5.15e-84	Anaerobic
2771315	2253.18	0	Anaerobic
2772397	128.52	9.75e-12	Anaerobic
2773525	907.16	1.12e-280	Anaerobic
2775882	466.56	8.11e-108	Anaerobic
2776396	550.66	3.01e-157	Anaerobic
2776851	235.45	8.93e-60	Anaerobic
2779368	364.49	1.45e-109	Anaerobic
2780445	251.9	3.97e-43	Anaerobic
2784689	185.87	2.55e-26	Anaerobic
2786785	178.7	5.82e-18	Anaerobic
2793642	362.2	9.24e-64	Anaerobic
2795176	158.36	1.04e-18	Anaerobic
2795737	175.08	4.55e-28	Anaerobic
2796560	4285.07	0	Anaerobic
2798676	202.29	3.26e-27	Anaerobic
2807579	1623.05	0	Anaerobic
2808775	825.42	2.27e-257	Anaerobic
2809370	738.72	3.54e-211	Anaerobic
2810027	131.14	1.84e-15	Anaerobic
2812240	129.38	7.27e-09	Anaerobic
2813081	255.02	1.12e-76	Anaerobic
2814768	879.7	0	Anaerobic
2815548	1015.78	0	Anaerobic
2816317	1386.58	0	Anaerobic
2816723	12905.1	0	Anaerobic
2817223	1115.95	0	Anaerobic
2817708	347.99	2.54e-85	Anaerobic
2820105	2146.74	0	Anaerobic
2820735	219.81	1.58e-38	Anaerobic
2821827	353.09	1.26e-73	Anaerobic
2823637	1109.33	0	Anaerobic
2826974	380.07	6.41e-81	Anaerobic
2830292	139.92	8.12e-18	Anaerobic
2835530	364.12	2.47e-106	Anaerobic
2837399	1260.79	0	Anaerobic
2841134	171.78	2.08e-31	Anaerobic
2850591	147.5	1.48e-21	Anaerobic
2852312	296.36	2.35e-57	Anaerobic
2855037	999.15	0	Anaerobic
2856634	328.42	6.92e-52	Anaerobic
2858838	309.17	5.04e-50	Anaerobic
2859292	219.73	8.65e-28	Anaerobic
2861617	225.84	3.12e-35	Anaerobic
2864529	208.6	2.49e-28	Anaerobic
2865736	134.64	4.98e-36	Anaerobic
2866138	6761.5	0	Anaerobic
2866861	136.54	1.47e-35	Anaerobic
2868678	133.42	7.58e-15	Anaerobic
2870936	753.63	1.44e-255	Anaerobic
2871398	306.87	8e-69	Anaerobic
2874566	945.97	0	Anaerobic
2876539	655.85	1.23e-270	Anaerobic
2883424	170.45	1.16e-27	Anaerobic
2884754	160.28	1.06e-21	Anaerobic
2885379	1117.27	0	Anaerobic
2889980	6790.66	0	Anaerobic
2890661	3163.64	0	Anaerobic
2893803	623.76	2.19e-183	Anaerobic
2897321	139.89	1.9e-13	Anaerobic
2898378	325.78	3.06e-46	Anaerobic
2899905	152.7	1.28e-17	Anaerobic
2901612	1819.32	0	Anaerobic
2902492	1029.62	0	Anaerobic
2903458	1109.94	0	Anaerobic
2906049	327.75	6.42e-79	Anaerobic
2906897	2880.04	0	Anaerobic
2907750	10507.3	0	Anaerobic
2908326	134.55	1.48e-14	Anaerobic
2909060	243.73	2.68e-44	Anaerobic
2911137	155.49	1.11e-14	Anaerobic
2911849	831.59	7.01e-278	Anaerobic
2913024	2012.68	0	Anaerobic
2913438	214.2	3.62e-54	Anaerobic
2914417	225.39	3.5e-41	Anaerobic
2918254	153.12	2.09e-19	Anaerobic
2921047	417.75	5.11e-127	Anaerobic
2922539	10078.4	0	Anaerobic
2923083	19770.8	0	Anaerobic
2923778	147.78	5.21e-18	Anaerobic
2924310	290.97	2.69e-63	Anaerobic
2925014	381.07	1.08e-105	Anaerobic
2926119	825.49	1.15e-275	Anaerobic
2929065	697.66	7.31e-215	Anaerobic
2930666	185.89	9.25e-24	Anaerobic
2936744	404.84	4.96e-113	Anaerobic
2937349	338.87	2.57e-70	Anaerobic
2938059	229.07	7.26e-37	Anaerobic
2940010	305.66	2.1e-111	Anaerobic
2940671	524.89	9.9e-154	Anaerobic
2941348	233.18	4.9e-75	Anaerobic
2944078	1215.08	0	Anaerobic
2945390	15391	0	Anaerobic
2946060	1033.31	0	Anaerobic
2947238	2252.43	0	Anaerobic
2949109	259.15	2.4e-49	Anaerobic
2954225	184.64	4.79e-30	Anaerobic
2959166	130.96	2.57e-12	Anaerobic
2960502	162.2	2.94e-20	Anaerobic
2963709	336.01	6.95e-76	Anaerobic
2964142	2193.33	0	Anaerobic
2967004	1907.32	0	Anaerobic
2967692	881.2	0	Anaerobic
2968418	6977.68	0	Anaerobic
2969273	457.96	3.03e-180	Anaerobic
2969602	453.22	4.65e-188	Anaerobic
2970668	226.23	5.29e-23	Anaerobic
2974073	296.38	4.75e-76	Anaerobic
2974585	374.46	7.13e-167	Anaerobic
2976950	255.73	9.27e-63	Anaerobic
2978724	279.38	2.55e-41	Anaerobic
2979990	210.8	1.37e-37	Anaerobic
2980457	270.25	1.38e-36	Anaerobic
2981268	468.25	5.18e-136	Anaerobic
2985064	418.76	1.92e-87	Anaerobic
2986475	236.39	9.15e-51	Anaerobic
2989160	143.54	7.44e-11	Anaerobic
2991385	464.36	1.07e-110	Anaerobic
2993764	624.13	4.99e-178	Anaerobic
2996094	329.45	3.07e-113	Anaerobic
2996614	343.44	4.46e-157	Anaerobic
2997083	13330.6	0	Anaerobic
2997633	284.72	3.4e-170	Anaerobic
2997935	901.94	0	Anaerobic
3000642	312.21	7.14e-60	Anaerobic
3002006	143.32	4.18e-14	Anaerobic
3002686	292.4	2.07e-75	Anaerobic
3005371	187.34	4.02e-41	Anaerobic
3013082	769.42	8.48e-232	Anaerobic
3014414	564.56	1.68e-150	Anaerobic
3015214	132.49	2.66e-12	Anaerobic
3016624	130.57	6.81e-12	Anaerobic
3018654	132.6	1.92e-10	Anaerobic
3023604	608.81	2.15e-177	Anaerobic
3031050	276.31	1.09e-66	Anaerobic
3034344	23056.2	0	Anaerobic
3037337	375.58	3.99e-118	Anaerobic
3037825	473.64	3.46e-191	Anaerobic
3039308	898.47	0	Anaerobic
3040001	343.41	1.7e-106	Anaerobic
3040817	143.47	5.06e-33	Anaerobic
3041190	275.12	2.92e-62	Anaerobic
3041669	398.33	3.62e-89	Anaerobic
3048828	179.55	5.53e-33	Anaerobic
3053515	8377.6	0	Anaerobic
3053996	11239.1	0	Anaerobic
3054890	13186.9	0	Anaerobic
3056473	9988.19	0	Anaerobic
3057360	416.21	3.37e-128	Anaerobic
3057757	765.58	2.01e-276	Anaerobic
3064450	714.18	3.24e-190	Anaerobic
3065149	697.49	4.03e-254	Anaerobic
3066142	404.39	2.28e-101	Anaerobic
3067897	2186.49	0	Anaerobic
3070871	1958.95	0	Anaerobic
3071847	3625.93	0	Anaerobic
3072435	204.58	1.88e-31	Anaerobic
3073257	747.67	6.55e-267	Anaerobic
3074612	211.07	2.06e-34	Anaerobic
3077528	1649	0	Anaerobic
3079113	159.1	5.1e-28	Anaerobic
3079737	2850.44	0	Anaerobic
3080916	127.57	6.84e-14	Anaerobic
3081900	3065.88	0	Anaerobic
3083972	308.76	1.51e-78	Anaerobic
3084597	8461.31	0	Anaerobic
3085277	1318.73	0	Anaerobic
3085908	134.94	4.62e-50	Anaerobic
3086209	130.9	1.38e-59	Anaerobic
3087796	427.81	2.35e-89	Anaerobic
3089081	4773.47	0	Anaerobic
3089505	264.11	1.14e-51	Anaerobic
3090921	893.52	5.82e-296	Anaerobic
3091960	259.26	5.3e-46	Anaerobic
3093084	480.37	8.64e-158	Anaerobic
3093690	133.7	6.26e-29	Anaerobic
3094655	169.05	4.17e-29	Anaerobic
3096540	1645.76	0	Anaerobic
3097523	149.4	4.55e-13	Anaerobic
3098933	675.22	7.86e-207	Anaerobic
3099474	143.24	5.86e-36	Anaerobic
3100929	574.27	2.21e-248	Anaerobic
3102025	177.78	1.33e-30	Anaerobic
3102579	266.36	9.63e-53	Anaerobic
3103427	303.33	2.71e-80	Anaerobic
3107465	4247.9	0	Anaerobic
3108337	11130.2	0	Anaerobic
3109252	30384.2	0	Anaerobic
3110364	372.13	4.91e-66	Anaerobic
3111960	419.62	4.55e-98	Anaerobic
3114460	193.44	1.13e-26	Anaerobic
3117253	551.07	1e-177	Anaerobic
3117995	1938.29	0	Anaerobic
3119587	159.76	2.29e-33	Anaerobic
3126827	232.32	2.59e-41	Anaerobic
3128101	165.32	2.1e-47	Anaerobic
3131216	198.85	8.94e-37	Anaerobic
3135946	210.28	4.71e-31	Anaerobic
3136623	619.12	6.28e-174	Anaerobic
3137971	1229.25	0	Anaerobic
3139236	165.06	6.35e-28	Anaerobic
3141025	156.11	4.71e-16	Anaerobic
3144423	7947.13	0	Anaerobic
3147529	1132.29	0	Anaerobic
3149989	427.88	4.02e-124	Anaerobic
3151553	2232.8	0	Anaerobic
3153309	622.15	4.03e-185	Anaerobic
3155631	365.13	1.98e-121	Anaerobic
3156572	553.09	2.27e-139	Anaerobic
3158691	136.58	1.15e-44	Anaerobic
3159213	1386.8	0	Anaerobic
3161577	2772.71	0	Anaerobic
3164037	7131.49	0	Anaerobic
3165336	265.76	2.17e-57	Anaerobic
3165755	129.17	3.24e-16	Anaerobic
3166571	1102.6	0	Anaerobic
3167212	377.07	3.17e-84	Anaerobic
3170513	655.78	1.66e-189	Anaerobic
3171150	1451.59	0	Anaerobic
3172920	442.28	4.8e-118	Anaerobic
3173660	562.45	5.88e-152	Anaerobic
3174304	181.92	7.24e-34	Anaerobic
3174975	1236.93	0	Anaerobic
3175986	1449.62	0	Anaerobic
3177749	1262.83	0	Anaerobic
3179048	229.72	4.95e-59	Anaerobic
3180468	744.29	6.75e-250	Anaerobic
3180877	438.46	4.73e-104	Anaerobic
3181639	1880.11	0	Anaerobic
3182733	7873.92	0	Anaerobic
3184028	164.99	3.22e-24	Anaerobic
3185465	1460.02	0	Anaerobic
3186239	162.15	2.62e-21	Anaerobic
3187781	188.48	2.27e-27	Anaerobic
3188469	802.57	1.09e-204	Anaerobic
3189132	2434.55	0	Anaerobic
3190099	195.05	3.61e-73	Anaerobic
3192874	8757.17	0	Anaerobic
3193252	7936.35	0	Anaerobic
3194811	602.33	1.12e-174	Anaerobic
3199053	799.96	4.76e-306	Anaerobic
3199896	710.22	1.57e-244	Anaerobic
3202231	991.42	0	Anaerobic
3202680	2234.91	0	Anaerobic
3203463	169.87	1.72e-43	Anaerobic
3204631	562.66	4.5e-135	Anaerobic
3208728	40610.9	0	Anaerobic
3210608	292.81	6.25e-80	Anaerobic
3212141	136.93	5.92e-12	Anaerobic
3213617	15796.5	0	Anaerobic
3214734	132.88	5.98e-20	Anaerobic
3219439	145.92	7.74e-13	Anaerobic
3228768	278.43	4.56e-49	Anaerobic
3229248	192.47	3.27e-23	Anaerobic
3232765	673.12	1.2e-224	Anaerobic
3233948	904.71	2.72e-291	Anaerobic
3234933	151.94	1.75e-23	Anaerobic
3235608	165.62	1.96e-41	Anaerobic
3236396	2801.82	0	Anaerobic
3237917	1092.63	0	Anaerobic
3239793	188.27	7.12e-21	Anaerobic
3242806	298.05	1.42e-40	Anaerobic
3244658	5889.63	0	Anaerobic
3245185	403.04	3.11e-107	Anaerobic
3245615	2093.52	0	Anaerobic
3246928	141.59	1.79e-19	Anaerobic
3249010	175.07	6.95e-28	Anaerobic
3250292	214.45	7.17e-75	Anaerobic
3252299	1918.89	0	Anaerobic
3253039	1726.04	0	Anaerobic
3254802	528.19	5.74e-139	Anaerobic
3265437	172	5.81e-27	Anaerobic
3266946	220.56	3.14e-22	Anaerobic
3268608	2268.14	0	Anaerobic
3274979	275.26	3.1e-60	Anaerobic
3276347	1339.85	0	Anaerobic
3280949	142.24	1.5e-12	Anaerobic
3282135	3210.39	0	Anaerobic
3285886	419.45	2.36e-90	Anaerobic
3287209	264.28	1.8e-126	Anaerobic
3287698	160.74	7.46e-94	Anaerobic
3289215	220.46	4.03e-36	Anaerobic
3289611	128.02	8.59e-11	Anaerobic
3290195	130.71	9.89e-16	Anaerobic
3291431	4227.22	0	Anaerobic
3293769	435.34	3.32e-175	Anaerobic
3296175	181.73	5.19e-38	Anaerobic
3297970	382.58	1.71e-80	Anaerobic
3299317	2099.65	0	Anaerobic
3303934	304.93	3.42e-78	Anaerobic
3306716	7999.9	0	Anaerobic
3309331	2163.76	0	Anaerobic
3309805	17511.5	0	Anaerobic
3311212	216.42	9.73e-27	Anaerobic
3315152	1525.68	0	Anaerobic
3316381	40484.3	0	Anaerobic
3317600	179.86	3.78e-35	Anaerobic
3318213	206.45	8.68e-42	Anaerobic
3319596	404.64	2.12e-123	Anaerobic
3320616	20009.9	0	Anaerobic
3322331	286.53	1.2e-85	Anaerobic
3323666	505.39	2.09e-142	Anaerobic
3325019	894.54	0	Anaerobic
3325772	7490.26	0	Anaerobic
3326204	2746.88	0	Anaerobic
3326938	3341.16	0	Anaerobic
3328865	288.18	9.8e-76	Anaerobic
3330081	436.91	3.15e-146	Anaerobic
3331550	17603.9	0	Anaerobic
3334289	179.76	9.7e-30	Anaerobic
3334849	4157.73	0	Anaerobic
3335949	156.12	5.74e-34	Anaerobic
3337310	163.72	1.88e-43	Anaerobic
3338257	4037.32	0	Anaerobic
3338744	1944.5	0	Anaerobic
3339743	133.49	1.66e-46	Anaerobic
3340263	845.46	2.31e-300	Anaerobic
3340911	287.45	2.39e-78	Anaerobic
3341837	219.22	2.47e-37	Anaerobic
3342706	3870.15	0	Anaerobic
3343705	130.63	1.89e-13	Anaerobic
3344578	391.38	1.4e-151	Anaerobic
3345139	233.09	6.71e-32	Anaerobic
3345814	131.71	8.72e-10	Anaerobic
3346392	479.12	2.45e-182	Anaerobic
3347336	187.04	1.33e-26	Anaerobic
3348592	2043.12	0	Anaerobic
3351061	210.39	1.09e-60	Anaerobic
3352084	24323.1	0	Anaerobic
3352538	18123.6	0	Anaerobic
3358898	1019.66	0	Anaerobic
3359516	350.38	6.62e-79	Anaerobic
3360971	396.2	3.77e-130	Anaerobic
3361462	270.1	8.76e-53	Anaerobic
3361932	283.4	3.1e-58	Anaerobic
3362465	173.2	9.68e-25	Anaerobic
3362957	516.18	7.87e-146	Anaerobic
3365118	151.43	8.39e-92	Anaerobic
3365668	898.96	0	Anaerobic
3366169	143.96	1.43e-12	Anaerobic
3371704	293.59	4.79e-51	Anaerobic
3372531	728.44	2.42e-194	Anaerobic
3373027	138.36	1.09e-21	Anaerobic
3373550	196.84	1.13e-49	Anaerobic
3374800	1490.32	0	Anaerobic
3375588	19211.7	0	Anaerobic
3376833	26373.6	0	Anaerobic
3378151	3218.67	0	Anaerobic
3378714	270.24	1.13e-53	Anaerobic
3380198	1101.56	0	Anaerobic
3382612	8021.86	0	Anaerobic
3384200	129.77	1.39e-13	Anaerobic
3385708	525.92	6.05e-129	Anaerobic
3386430	152.02	1.45e-25	Anaerobic
3386971	536.8	2.72e-144	Anaerobic
3387456	781.44	9.65e-283	Anaerobic
3388511	246.13	9.27e-37	Anaerobic
3390050	150.57	4.25e-11	Anaerobic
3390455	403.13	5.49e-150	Anaerobic
3391949	171.56	2.87e-18	Anaerobic
3392473	506.6	1.95e-133	Anaerobic
3395843	294.11	5.28e-92	Anaerobic
3396478	907.29	0	Anaerobic
3398551	276.04	1.36e-61	Anaerobic
3399144	6626.31	0	Anaerobic
3401437	905.45	3.21E-314	Anaerobic
3402755	282.96	2.72e-115	Anaerobic
3403199	2960.36	0	Anaerobic
3405381	488.13	1.03e-122	Anaerobic
3407177	322.71	1.84e-73	Anaerobic
3408265	8785.56	0	Anaerobic
3409051	158.3	5.72e-22	Anaerobic
[truncated: 3,665 more rows]
