# Supplementary material for: Genome-scale Analysis of Escherichia coli FNR Reveals Complex Features of Transcription Factor Binding
Source: PLoS Genet. 2013 Jun 20;9(6):e1003565. doi: 10.1371/journal.pgen.1003565 (PMC3688515; doi:10.1371/journal.pgen.1003565)
Supplement: Table S5 — FNR ChIP-chip and ChIP-seq peaks identified in this study. (XLS) [file pgen.1003565.s011.xls]

## Sheet: Sheet1
Table S5. Peaks identified in ChIP-chip experiments (using the peak finding algorithm CMARRT) and ChIP-seq experiments (using the peak finding algorithms MOSAiCS, NCIS and CisGenome) as well as the presence of each peak in previous FNR ChIP-chip experiments [4] and PatSer ln(p-value) [5]. Peaks removed from analysis are shown at the end of the table.
Approx Peak Center a	Gene Downstream b	MOSAiCS (ChIP-seq) c	NCIS (ChIP-seq) d	CisGenome (ChIP-seq) e	CMARRT (ChIP-chip) f	Found in previous FNR ChIP-chip g	FNR PWM PatSer ln(p-value) h
170	thrL	+	+	+	+	-	-5.52
20586	w/i insA-1	+	-	-	+	-	-7.8
29615	carA	+	+	+	+	-	-11.33
34065	caiF	+	+	+	+	+	-5.1
89279	mraZ	-	-	-	+	-	N/A
121981	aroP/pdhR	+	+	+	+	+	-7.1
142603	can/yadG	+	+	-	+	-	-6.18
237005	yafT (w/i aspV)	+	+	+	+	-	-5.3
262283	5' of thrW/ykfI	+	+	+	+	-	-6.89
281405	yagA/yagE	+	+	+	+	-	-9.04
296412	intF	-	-	-	+	-	N/A
310756	matA/ykgL	+	+	+	+	-	-6.55
393651	yaiV	-	+	-	-	-	-12.78
400344	ddlA/iraP	+	+	+	+	-	-7.82
451133	cyoA	-	-	-	+	-	N/A
490536	apt	+	-	-	-	-	-5.67
528277	w/i G6272	+	+	+	+	+	-7.09
579745	ylcI/nohB	+	+	+	+	+	-15.83
611865	fepA/fes	-	+	-	-	-	-5.22
621417	fepD/entS	-	+	-	+	-	-6.5
624047	fepB/entC	-	+	-	+	-	-9.15
655340	dcuC/pagP	+	+	+	+	-	-10.96
747110	abrB	+	+	+	+	+	-6.7
766478	w/i mngA	-	-	-	+	-	N/A
770405	cydA	+	+	+	+	+	-13.45
816051	ybhK/moaA	+	+	+	+	+	-11.98
855098	ybiS/ybiT	+	+	+	+	-	-5.67
862807	ybiY/fsaA	+	+	+	-	-	-13.06
872201	yliE	+	-	-	-	-	-5.49
877451	rimO/bssR	+	+	+	+	-	-7.87
892196	ybjN	-	+	-	+	-	-6.05
913181	hcp	+	+	+	+	+	-11.6
915496	aqpZ/ybjD	+	+	+	+	-	-12.42
925085	5' of clpA/serW	-	+	-	-	-	-4.97
939992	dmsA	+	+	+	+	+	-10.34
953746	focA	+	+	+	+	+	-7
986314	ompF	-	-	-	+	-	N/A
1003974	pyrD	+	+	+	+	+	-10.14
1014816	rmf	+	-	-	+	-	-6.28
1019297	ompA	+	+	+	+	-	-9.13
1030727	yccA	+	+	+	+	-	-9.55
1031455	serT/hyaA	+	+	-	+	-	-8.09
1049863	5' of insAB-4/cspH	+	+	+	-	-	-5.76
1151092	fabF	+	+	-	+	-	-5.1
1156965	ptsG	+	+	+	+	-	-9.18
1164183	ycfP	+	+	+	+	+	-6.98
1165156	ndh	+	+	+	+	+	-14.67
1185070	potA/pepT	+	+	+	+	-	-8.05
1214022	w/i ycgF	+	-	-	+	-	-11.34
1250253	dhaK/dhaR	-	+	+	+	-	-6.13
1262856	lolB/hemA	+	-	+	+	-	-8.3
1277080	narX/narK	+	+	+	-	+	-16.52
1278996	narG	+	+	+	+	-	-13.34
1297573	adhE/ychE	+	+	+	+	+	-5.74
1298746	oppA	+	-	+	+	-	-7.71
1301035	oppB	-	-	-	+	-	N/A
1308281	kch	-	-	-	+	-	N/A
1309141	yciI/tonB	+	+	-	+	-	-6.26
1311943	yciC/ompW	+	+	+	+	+	-13.56
1397630	fnr	+	+	+	+	-	-12.16
1407153	fnrS	+	+	+	+	-	-11.69
1433743	uspF	+	+	+	+	-	-13.22
1438991	ydbK/ydbJ	+	-	-	-	-	-5.76
1488800	gapC_1/cybB	-	-	-	+	-	N/A
1515350	yncL/ydcX	+	+	+	+	+	-13.06
1545309	yddG/fdnG	+	+	+	+	+	-12.93
1608774	uxaB	+	+	+	+	-	-5.8
1620843	5' of yneM/mgrR	-	+	-	-	-	-6.69
1627210	ydfZ	+	+	+	+	+	-12.09
1634702	nohA/ynfO	+	+	+	+	+	-15.83
1640402	5' of cspF/ydfT	-	+	-	+	-	-5.56
1656063	ynfE	+	+	+	+	-	-11.5
1665276	ynfK	+	+	+	+	+	-9.37
1702469	ydgJ/blr	+	-	+	+	-	-10.18
1710501	tppB	-	-	-	+	-	N/A
1715354	tyrS	+	+	+	+	-	-7.56
1717794	anmK/slyB	+	+	+	+	+	-6.45
1718996	slyA/ydhI	+	+	+	+	+	-8.92
1735542	ynhF/purR	+	+	+	+	-	-6.77
1739387	cfa	+	-	-	+	-	-4.63
1744589	ydhR	+	+	+	+	-	-5.55
1752706	ydhY	+	+	+	+	-	-13.34
1763161	rydB (w/i ydiH)	+	+	+	+	-	-8.88
1777227	ydiP/ydiQ	+	+	+	-	+	-14.58
1831407	ydjX	+	+	+	+	-	-6.85
1837436	ynjE	+	+	+	+	-	-8.84
1860713	msrB/gapA	+	+	+	+	-	-9.58
1868480	yeaI	+	+	+	+	-	-13.68
1935553	pykA	+	+	+	+	+	-8.9
1977432	insA-5/uspC	-	-	-	+	-	N/A
1986016	isrB/yecR	-	+	-	-	-	-9.9
1987521	yecH/tyrP	+	+	+	+	-	-7.05
2006195	yedD	+	-	-	+	-	-5.01
2042711	yeeJ	-	+	-	-	-	-6.08
2057899	yeeO/asnU	+	+	+	+	-	-6.08
2066524	insH-6/yoeA	+	+	+	+	+	-11.09
2088061	hisG	+	+	+	+	-	-6.47
2176754	fbaB/yegT	+	-	-	-	-	-6.74
2264162	yeiQ	+	+	+	+	-	-9.51
2284296	w/i proL	-	+	-	-	-	-4.83
2301669	napF/yojO	+	-	-	+	-	-5.37
2310722	w/i ompC/micF	+	+	-	-	-	-5.86
2341665	w/i yfaL	+	+	-	+	-	-6.45
2342590	yfaL/nrdA	+	+	+	+	-	-7.49
2377346	menD	+	+	+	+	-	-9.36
2403450	nuoA	+	+	+	+	+	-8.77
2405145	lrhA/yfbQ	-	-	-	+	-	N/A
2411404	yfbV/ackA	+	+	+	+	+	-8.96
2415092	yfcC	+	+	+	+	+	-8.64
2452937	w/i yfcU	+	+	+	+	-	-7.04
2459154	yfcZ/fadL	+	+	+	+	-	-10.4
2531616	ptsH	+	+	+	+	-	-8.57
2548637	yfeX	+	+	+	-	-	-7.48
2558359	yffL	+	+	+	+	+	-8.84
2561450	yffQ	+	-	-	+	-	-7.72
2562444	yffS	+	+	+	+	+	-11.69
2583785	aegA/narQ	-	-	-	+	+	N/A
2618981	upp/purM	+	+	+	+	+	-12.08
2627146	yfgF/yfgG	+	+	+	+	-	-14.9
2632231	guaB/xseA	+	+	+	+	+	-11.44
2685473	glnB	-	+	-	-	-	-4.85
2714607	yfiD/ung	+	+	+	+	+	-5.75
2716583	yfiF/trxC	+	+	+	+	-	-7.15
2735029	raiA (w/i G7353)	+	+	-	+	-	-5.5
2739858	yfiR	+	-	-	-	-	-7.39
2753568	yfjL/rnlA (w/i yfjM)	+	+	+	+	-	-5.3
2753666	ssrA	+	+	+	+	-	-6.43
2754018	intA	+	+	-	+	-
2756262	w/i yfjH	+	+	-	+	-	-11.05
2763603	yfjL/rnlA	+	+	+	-	-	-5.3
2848695	hycA/hypA	+	+	+	-	-	-5.29
2889857	cysJ/queD	-	+	-	-	-	-5.93
2890619	ygcN	+	+	+	+	-	-7.11
2907811	pyrG	+	+	+	+	-	-5.52
2945336	mltA/metZ	+	+	+	+	-	-5.06
3013117	yqeC/mocA	+	+	-	-	-	-5.76
3084695	yqgD/metK	+	-	-	+	-	-5.55
3108350	5' of pheV/yghD	-	+	-	-	-	-4.56
3144396	hybO	+	+	+	+	+	-6.53
3150130	exbB/metC (w/i G7562)	+	+	-	-	+	-5.72
3151595	yghB	+	+	+	+	+	-6.15
3153204	yqhC/yqhD	+	+	+	+	-	-9.43
3181647	5' of zupT/ribB	+	+	+	+	-	-7.97
3182480	ribB	+	-	-	-	-	-6.93
3192761	ibsD	+	+	-	-	-	-6.08
3217288	aer/ygjG	+	+	+	+	-	-10.23
3229415	fadH	-	+	-	-	-	-4.39
3242844	uxaC/exuT	+	+	+	+	+	-12.15
3265573	yhaB	+	+	+	+	+	-13.17
3273193	garP/garD	+	+	+	+	-	-11.26
3299423	yhbT/yhbU	+	+	+	+	+	-8.72
3306070	deaD	+	+	+	+	-
3309259	pnp/psrO	+	-	-	-	-	-5.21
3309706	rpsO	-	-	-	+	-	N/A
3316312	rimP (w/i metY)	+	+	+	+	-	-4.87
3320105	w/i leuU and w/i secG	+	+	+	+	-	-7.16
3320479	secG	+	+	-	+	-	-7.16
3332757	sfsB	-	+	-	-	-	-5.75
3352160	yhcC/gltB	+	+	-	+	+	-10.08
3352500	yhcC/gltB	+	+	+	+	-	-10.08
3375694	sspA	+	-	-	-	-	-6.13
3376762	rplM	+	+	-	+	-	-6.28
3408206	dusB	+	+	+	+	-	-6.9
3431676	smf/def	+	+	-	-	-	-7.24
3451329	rpsJ	+	+	+	+	-	-4.78
3490525	ppiA/tsgA	-	+	-	+	-	-10.91
3491944	nirB	+	+	+	+	+	-16.52
3537996	feoA	+	-	-	+	-	-13.13
3544552	gntT	+	-	-	-	-	-6.02
3573122	asd/yhgN	+	+	+	+	-	-9.13
3611593	nikA	+	+	+	+	-	-9.55
3635599	yhiN/pitA	+	+	+	+	+	-8.05
3637954	uspB/uspA	+	+	+	+	-	-9.23
3652636	dctR	-	+	-	-	-	-6.95
3654213	yhiD (w/i hdeB)	+	+	+	+	-	-7.03
3654886	hdeA/hdeD	+	+	-	+	-	-7.03
3656023	gadE	+	+	-	+	-	-8.95
3656507	gadE	+	+	-	+	-	-11.04
3662892	gadW/gadY	-	-	-	+	-	N/A
3679159	w/i yhjJ	-	+	-	-	-	-5.74
3710913	w/i yhjY/tag	+	-	-	-	-	-6.86
3718007	cspA	+	+	+	+	-	-11.07
3739624	ysaA	+	+	-	+	-	-5.39
3767021	yibV	-	+	-	-	-	-4.43
3783221	yibN/gpmM	+	+	+	+	-	-5.94
3882266	dnaA/rpmH	+	+	+	+	-
3889560	mdtL	-	+	-	+	-	-6.94
3920225	atpB (w/i atpI)	+	+	-	+	-	-7.2
3929221	ravA/kup	+	+	+	+	+	-9.76
3964346	rho	+	+	-	+	-	-5.61
3965827	rfe	-	+	-	-	-	-4.02
3984609	5' of glmZ/hemY	-	+	-	-	-	-5.16
4011275	metR/metE	+	-	-	-	-	-8.15
4048005	spf	+	+	+	+	-	-4.86
4105472	pfkA	+	+	+	-	-	-10.54
4109595	tpiA	+	+	+	+	-	-8
4117427	rraA	+	+	-	-	-	-9.02
4131735	katG	+	+	+	-	-	-12
4176422	rplK	+	+	-	+	-	-5.26
4213382	aceB	-	-	-	+	-	N/A
4228170	pepE/rluF	-	+	-	-	-	-7.12
4221792	iclR/metH	-	-	-	+	-	N/A
4231475	lysC/pgi	-	+	-	-	-	-4.49
4272137	uvrA/ssb	+	+	-	-	-	-10.91
4285671	acs/nrfA	+	+	+	+	+	-10.3
4297433	fdhF	+	+	-	-	-	-5.53
4347216	dcuB	+	+	+	+	+	-10.87
4364857	dcuA	-	+	-	-	-	-8.42
4366441	aspA/fxsA	+	+	-	+	+	-8.94
4368546	yjeH/groS	+	+	+	-	-	-7.68
4374888	sugE	+	+	-	-	-	-6.09
4380456	frdA/poxA	+	+	+	+	+	-5.15
4402756	purA	+	+	+	+	-	-6.68
4404022	nsrR	-	+	-	-	-	-6.03
4460936	nrdD	+	+	+	+	+	-14.45
4465528	treR/mgtA	-	+	-	-	-	-7.47
4470582	pyrL/G7878	-	+	-	+	-	-7.14
4494525	intB	-	+	-	-	-	-6.03
4563930	yjiM	+	+	+	+	-	-7.36
4566729	mdtM/yjiP	+	+	+	+	-	-9.82
4570327	yjiT	+	+	-	+	-	-7.46
4571618	yjiV (w/i yjiT)	+	+	+	+	-	-15.83
4584889	hsdR/mrr	+	+	+	-	+	-7.92
4600895	yjjP/yjjQ	+	+	-	-	-	-7.95
4604242	leuP	+	+	+	+	-	-7.46
4615188	yjjI/deoC	+	+	-	-	-	-8.33
4638594	lasT	+	+	+	+	-	-13.41
FNR ChIP-seq peaks removed from analysis.
21072	insAB-1/yaaY (w/i rpsT)	+	+	+	+	-	N/A
83675	leuA (w/i leuL)	+	+	+	+	-	N/A
223725	rrsH	+	-	-	+	-	N/A
224850	rrlH	+	-	-	+	-	N/A
228975	aspU	+	-	-	+	-	N/A
394721	w/i ampH	+	-	-	-	-	N/A
656581	w/i cspE	+	+	+	-	-	N/A
695591	metU	+	+	+	+	-	N/A
696166	w/i glnU	+	+	-	+	-	N/A
780215	valZ	+	+	+	+	-	N/A
925131	serW	-	+	-	+	-	N/A
938551	serS	+	+	-	+	-	N/A
961014	rpsA	+	+	+	+	-	N/A
1011029	pqiA	-	-	-	+	-	N/A
1146090	w/i yceD	+	-	-	-	-	N/A
1146989	w/i plsX	+	-	-	-	-	N/A
1286658	tyrV	+	+	-	+	-	N/A
1755609	lpp	+	+	-	-	-	N/A
1798171	rpmI	+	+	-	+	-	N/A
1989961	leuZ	+	+	+	+	-	N/A
2060458	5' of asnV/erfK	+	+	-	-	-	N/A
2261860	fruB/setB	+	-	-	+	-	N/A
2296259	napC	+	+	+	+	-	N/A
2516119	alaX	+	+	+	+	-	N/A
2519136	valX	+	+	+	+	-	N/A
2532249	w/i ptsI	+	-	-	-	-	N/A
2555471	eutC	+	+	+	-	-	N/A
2660337	iscR	+	+	+	-	-	N/A
2689300	glrK	+	+	-	-	-	N/A
2706894	w/i rseA	+	-	-	-	-	N/A
2715915	w/i yfiF	-	-	-	+	-	N/A
2727416	gltW	+	+	+	+	-	N/A
2729012	rrsG	+	+	+	+	-	N/A
2816406	argY	+	+	+	+	-	N/A
2904952	w/i eno	+	+	+	+	-	N/A
2905736	w/i eno	+	-	-	+	-	N/A
2922314	yqcC (w/i csrB)	+	+	+	+	-	N/A
2945777	w/i glyU	+	+	-	-	-	N/A
3054146	ygfA	+	+	+	+	-	N/A
3054928	sibC	+	+	-	-	-	N/A
3056102	w/i serA	+	-	-	-	-	N/A
3208880	ygjD/rpsU	+	+	+	+	-	N/A
3276791	agaR/kbaZ	+	+	-	-	-	N/A
3279899	agaS	+	+	+	-	-	N/A
3306564	yrbN (w/i nlpI)	+	+	+	+	-	N/A
3331416	rplU/ispB	+	-	+	+	-	N/A
3421630	rrlD	+	+	+	+	-	N/A
3439366	w/i rpsD	+	-	-	-	-	N/A
3440502	rpsM	+	-	+	+	-	N/A
3443616	w/i rplR	-	+	-	-	-	N/A
3444521	w/i rpsH	+	-	-	-	-	N/A
3446194	rplN	+	+	+	+	-	N/A
3472555	rpsL	+	+	-	-	-	N/A
3703899	dppB	-	+	-	-	-	N/A
3706677	w/i proK	-	+	-	-	-	N/A
3759284	selA	-	+	-	-	-	N/A
3809765	rpmB	+	+	-	-	-	N/A
3939686	rrsC	+	-	+	+	-	N/A
3942129	rrlC	+	-	-	+	-	N/A
3944011	rrlC	+	-	-	+	-	N/A
3945103	trpT	+	+	+	+	-	N/A
3948463	ilvX	+	+	+	+	-	N/A
3949710	w/i ilvG_2	+	+	-	-	-	N/A
3980628	leuT	+	+	+	+	-	N/A
4035057	rrlA	+	-	-	+	-	N/A
4166327	rrlB	+	+	-	+	-	N/A
4173777	thrT	+	+	+	+	-	N/A
4175283	secE	+	-	-	-	-	N/A
4177875	rplJ	+	+	-	+	-	N/A
4179011	rpoB	+	+	-	-	-	N/A
4207182	rrsE-rrlE	-	-	-	+	-	N/A
4368525	yjeH/groS	+	+	+	+	+	N/A
4390439	glyX	+	+	+	+	-	N/A
a Genomic location within each FNR ChIP-seq peak with the highest read count (the summit of the peak). If peak was found only in ChIP-chip data, the location is the center of the probe with the highest IP/INPUT ratio for the peak (the summit of the peak).
b First gene of the operon downstream of the FNR ChIP-seq peak, and gene name designation was obtained from EcoCyc [6]. For peaks located within divergent promoters, both genes are identified, separated by “/”. Peaks within known genes (“w/i”) are identified.
c Peak presence (+) or absence (-) in the FNR ChIP-seq data using the peak finding algorithm MOSAiCS [3].
d Peak presence (+) or absence (-) in the FNR ChIP-seq data using the peak finding algorithm NCIS [2].
e Peak presence (+) or absence (-) in the FNR ChIP-seq data using the peak finding algorithm CisGenome [1].
f Peak presence (+) or absence (+) in the FNR ChIP-chip data using the peak finding algorithm CMARRT.
g Peak presence (+) or absence (-) in the FNR ChIP-chip experiment performed previously [8].
h PatSer ln(p-value) for the PWM score found within each peak. Peaks removed from analysis or found only in ChIP-chip were not analyzed and are marked "N/A" [5].
