# Supplementary material for: Genome-scale Analysis of Escherichia coli FNR Reveals Complex Features of Transcription Factor Binding
Source: PLoS Genet. 2013 Jun 20;9(6):e1003565. doi: 10.1371/journal.pgen.1003565 (PMC3688515; doi:10.1371/journal.pgen.1003565)
Supplement: Table S10 — Operons found to be differentially expressed when comparing transcriptomic data from WT and Δfnr strains but lacking a corresponding FNR ChIP-seq peak upstream (Category 6). (XLS) [file pgen.1003565.s016.xls]

## Sheet: Sheet1
Table S10. Operons found to be statistically differentially expressed when comparing MG1655 and FNR- strains in two of the three transcriptomic experiments used in this study, but lacking a FNR ChIP-seq peak upstream (Category 6).
B-number of First Gene in Operon a	Operon b	FNR Regulation c	DE in Current Microarray Expression Data d	DE in Previous Microarray Expression Data e	DE in RNA-seq Expression Data f
b0929	ompF	Activated	+	-	+
b1073	flgBCDEFGHIJ	Activated	+	+	-
b2957	ansB	Activated	+	-	+
b3409	feoB	Activated	+	-	+
b3947	ptsA-fsaB-gldA	Activated	+	+	+
b4115	adiC	Activated	+	-	+
b0031	dapB	Repressed	+	-	+
b0118	acnB	Repressed	+	-	+
b0123	cueO	Repressed	+	+	-
b0419	yajO	Repressed	+	+	-
b0432	cyoABCDE	Repressed	+	+	+
b0450	glnK-amtB	Repressed	+	-	+
b0655	gltIJKL-sroC	Repressed	+	+	+
b0720	gltA	Repressed	+	+	+
b0721	sdhCDAB-sucABCD	Repressed	+	+	+
b0735	ybgE	Repressed	+	+	+
b0755	gpmA	Repressed	+	+	+
b0802	ybiJ	Repressed	+	-	+
b0812	dps	Repressed	+	+	-
b0854	potFGHI	Repressed	+	+	+
b0887	cydDC	Repressed	+	-	+
b0897	ycaC	Repressed	+	+	+
b1014	putA	Repressed	+	+	+
b1040	csgDEFG	Repressed	+	+	+
b1064	grxB	Repressed	+	+	-
b1188	ycgB	Repressed	+	+	+
b1189	dadAX	Repressed	+	-	+
b1216	chaA	Repressed	+	+	+
b1276	acnA	Repressed	+	-	+
b1283	osmB	Repressed	+	-	+
b1469	narU	Repressed	+	-	+
b1478	adhP	Repressed	+	-	+
b1482	osmC	Repressed	+	-	+
b1612	fumA	Repressed	+	-	+
b1656	sodB	Repressed	+	+	+
b1732	katE	Repressed	+	-	+
b1777	yeaC	Repressed	-	+	+
b1783	yeaGH	Repressed	+	+	+
b1841	yobA-yebZY	Repressed	+	+	+
b1897	otsBA	Repressed	+	+	+
b1905	ftnA	Repressed	-	+	+
b1967	hchA	Repressed	+	+	+
b1988	nac	Repressed	+	-	+
b2000	flu	Repressed	+	-	+
b2001	yeeRSTUVW	Repressed	+	-	+
b2080	yegP	Repressed	+	+	-
b2133	dld	Repressed	+	+	+
b2153	folE-yeiB	Repressed	+	-	+
b2209	eco	Repressed	+	-	+
b2234	nrdAB-yfaE	Repressed	+	+	+
b2236	yfaE	Repressed	+	+	+
b2252	ais	Repressed	+	+	-
b2266	elaB	Repressed	+	+	-
b2303	folX-yfcH	Repressed	+	+	+
b2310	argT-hisJQMP	Repressed	+	+	+
b2464	talA-tktB	Repressed	+	+	+
b2552	hmp	Repressed	+	-	+
b2665	ygaU	Repressed	+	-	+
b2672	ygaM	Repressed	+	+	-
b2741	rpoS	Repressed	+	+	+
b2936	yggG	Repressed	+	-	+
b3097	yqjCDEK	Repressed	+	+	-
b3160	yhbW	Repressed	+	+	+
b3236	mdh	Repressed	+	+	+
b3528	dctA	Repressed	+	-	+
b3615	yibD	Repressed	+	+	+
b3830	ysgA	Repressed	+	-	+
b3995	rsd	Repressed	+	-	+
b4014	aceBAK	Repressed	+	+	+
b4376	osmY	Repressed	+	-	+
a Identification number (B-number) for the first gene in each operon, obtained from EcoCyc [6].
b Operon showing a statistically change in expression in the FNR- strain compared to the WT strain (note that hmp is likely part of direct regulon). Operon designations were obtained from EcoCyc [6].
c Regulation by FNR as determined by transcriptomic experiments in this study.
d Operons significantly differentially expressed (DE) (+) or not DE (-) in the current expression microarray experiment.
e Operons significantly differentially expressed (DE) (+) or not DE (-) in the previous expression microarray experiment [8].
f Operons significantly differentially expressed (DE) (+) or not DE (-) expressed in the RNA-seq experiment.
