# Supplementary material for: Genome-scale Analysis of Escherichia coli FNR Reveals Complex Features of Transcription Factor Binding
Source: PLoS Genet. 2013 Jun 20;9(6):e1003565. doi: 10.1371/journal.pgen.1003565 (PMC3688515; doi:10.1371/journal.pgen.1003565)
Supplement: Table S14 — Source of all genome-scale data analyzed in this study. (XLS) [file pgen.1003565.s020.xls]

## Sheet: Sheet1
Table S14. Source of all genome-scale data analyzed in this study.
Data Set Name	Data Set Type	Source
WT FNR Anaerobic	ChIP-seq	This Study
WT FNR Anaerobic	ChIP-chip	This Study
∆fnr FNR Anaerobic	ChIP-chip	This Study
WT RNAP (σ70 Subunit) Anaerobic	ChIP-seq	This Study
WT RNAP (σ70 Subunit) Aerobic	ChIP-seq	This Study
WT RNAP (ß Subunit) Anaerobic	ChIP-chip	This Study
WT RNAP (ß Subunit) Aerobic	ChIP-chip	This Study
WT H-NS Anaerobic	ChIP-chip	This Study
WT H-NS Aerobic	ChIP-chip	This Study
WT IHF Anaerobic	ChIP-chip	This Study
WT Fis Aerobic	ChIP-seq	[29]
∆hns/∆stpA FNR Anaerobic	ChIP-chip	This Study
∆hns/∆stpA Aerobic	RNA Expression Array	This study
∆hns/∆stpA Anaerobic	RNA Expression Array	This Study
Ptac::fnr FNR Anaerobic (4 µM IPTG)	ChIP-chip	This Study
Ptac::fnr FNR Anaerobic (8 µM IPTG)	ChIP-chip	This Study
Ptac::fnr FNR Anaerobic (16 µM IPTG)	ChIP-chip	This Study
WT Anaerobic	RNA Expression Array	This Study, [17]
WT Anaerobic	RNA-seq	This Study
WT Aerobic	RNA Expression Array	This Study
∆fnr Anaerobic	RNA Expression Array	This Study, [17]
∆fnr Anaerobic	RNA-seq	This Study
